# Supplementary material for: 4-Dimethylaminopyridine-catalyzed dynamic kinetic resolution in asymmetric synthesis of P-chirogenic 1,3,2-oxazaphospholidine-2-oxides
Source: Royal Society of Chemistry journal article supplement (doi:10.1039/c6ra16686e), 2016-01-01
Supplement: c6ra16686e1.pdf [file c6ra16686e1.pdf]

## Supporting Information for

# 4-Dimethylaminopyridine-catalyzed Dynamic Kinetic Resolution in Asymmetric Synthesis of P-Chirogenic 1,3,2-Oxazaphospholidine-2- oxides

Lanlan Wang,<sup>a, b</sup> Shanshan Cao,<sup>c</sup> Zhijun Du,<sup>a</sup> Qiang Wu,<sup>a, b</sup> Zheng Bian,<sup>a</sup> Chuanqing  
Kang,<sup>\*a</sup> Lianxun Gao<sup>a</sup> and Jingping Zhang<sup>c</sup>

<sup>a</sup> State Key Laboratory of Polymer Physics and Chemistry, Changchun Institute of Applied  
Chemistry, Chinese Academy of Sciences, Changchun 130022, China. Email: kangcq@ciac.ac.cn.

<sup>b</sup> University of Chinese Academy of Sciences, Beijing 100049, China.

<sup>c</sup> Faculty of Chemistry, Northeast Normal University, Changchun 130024, China.

**CONTENTS:**

|                                                                                              |           |
|----------------------------------------------------------------------------------------------|-----------|
| <b>S1. General Information .....</b>                                                         | <b>2</b>  |
| <b>S2. General Procedure for the Synthesis of <i>P</i>-Stereogenic Oxazaphospholidines..</b> | <b>2</b>  |
| <b>S3. Optimization of Reaction Conditions .....</b>                                         | <b>2</b>  |
| <b>S4. Characterization of <i>P</i>-Stereogenic Oxazaphospholidines</b>                      | <b>3</b>  |
| <b>.....4</b>                                                                                |           |
| <b>S5. MS Analysis of the Reaction Mixture</b>                                               |           |
| <b>.....5</b>                                                                                | <b>5</b>  |
| <b>S6. NMR Traces .....</b>                                                                  | <b>5</b>  |
| <b>S7. NMR Spectra .....</b>                                                                 | <b>8</b>  |
| <b>S8. Computational Details .....</b>                                                       | <b>13</b> |

### **S1. General Information**

Unless otherwise noted, The NMR spectra were recorded on Bruker Avance III with CD<sub>2</sub>Cl<sub>2</sub> or CDCl<sub>3</sub> as solvent. The <sup>1</sup>H NMR were recorded at 400 MHz or 300 MHz with TMS as internal standard. The <sup>13</sup>C NMR spectra were recorded at 100 MHz with solvent as internal standard. The <sup>31</sup>P NMR were recorded at 162 MHz with tri(o-toluy)phosphine as internal standard. All coupling constants (*J* values) were reported in Hertz (Hz). High resolution mass spectra (HRMS) were measured using a Bruker Autoflex III MALDI-TOF mass spectrometer. The purification of products with column chromatography was performed on silica gel with 100–200 mesh.

All reagents were obtained from commercial sources and were used without further purification.

### **S2. General Procedure for the Synthesis of P-Stereogenic Oxazaphospholidines**

DMAP (0.06 mmol, 0.3 equiv) and the aminoethanol (0.2 mmol, 1.0 equiv) was dissolved in DCM (2.0 mL) in ice-water bath. The base (0.6 mmol, 3.0 equiv) and PhP(O)Cl<sub>2</sub> (0.3 mmol, 1.5 equiv) was added successively. The mixture was stirred at 25 °C for 10 h. After completion of the reaction, DCM (5 mL) was added to the reaction mixture, which was washed with saturated aqueous NaHCO<sub>3</sub> for three times. The organic layer were then dried over MgSO<sub>4</sub>, filtered, and tri(o-toluy)phosphine was added as internal standard. The resulting mixture was concentrated under reduced pressure. The yield and the dr were detected by <sup>1</sup>H NMR.

### **S3. Optimization of reaction conditions**

Here presented external optimization of conditions for the reaction between prolinols **2s** and phenylphosphoryl dichloride (**1**). The solvent effect was evaluated for the reaction between **2a** and **1** without using of DMAP (Table S1). The relation between DMAP loading and diastereoselectivity was checked for the reactions between **2a**

with 1.1 eq of **1** (Table S2). In comparison with the reaction using 1.5 eq of **1**, lower amount of **1** resulted in decrease of diastereoselectivity. For the reaction between **2b** with **1**, larger amount of DMAP was required to reach high diastereoselectivity, while better results could be obtained by replacement of triethylamine with imidazole as base (Table S3).

**Table S1** Screening of the solvent

1.0 eq.      1.5 eq.      TEA ( 3.0eq. )  
solvent

| Entry    | Solvent           | Yield (%) | <i>dr</i> |
|----------|-------------------|-----------|-----------|
| <b>1</b> | DCM               | 79        | 83:17     |
| <b>3</b> | CHCl <sub>3</sub> | 80        | 83:17     |
| <b>6</b> | toluene           | 88        | 80:20     |
| <b>2</b> | THF               | 0         | -         |
| <b>4</b> | DMF               | 0         | -         |
| <b>5</b> | DMF : DCM (1 : 1) | 0         | -         |

**Table S2** The results of the reaction of **2a** with 1.1 eq. PhP(O)Cl<sub>2</sub>

1.0 eq.      1.1 eq.      DMAP  
TEA ( 3.0eq. )  
DCM

| Entry | DMAP (eq.) | <i>dr</i> | Yield (%) |
|-------|------------|-----------|-----------|
| 1     | 0.3        | 79:21     | 78.5      |
| 2     | 0.4        | 85:15     | 80.2      |
| 3     | 0.6        | 86:14     | 76.7      |
| 4     | 0.8        | 97:3      | 93.4      |
| 5     | 1.0        | 93:7      | 86.4      |

|   |     |       |      |
|---|-----|-------|------|
| 6 | 1.1 | 83:17 | 81.3 |
| 7 | 1.2 | 83:17 | 89.2 |

**Table S3** Screening of the amount of DMAP in the reaction of **2b** with PhP(O)Cl<sub>2</sub>

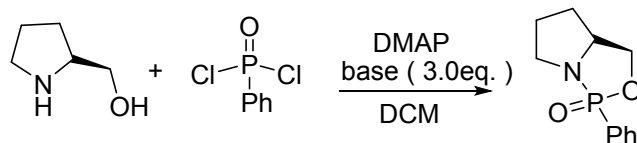

| Entry | DMAP (eq.) | Base      | <i>dr</i> |
|-------|------------|-----------|-----------|
| 1     | 0          | TEA       | 63:37     |
| 2     | 0.3        | TEA       | 75:25     |
| 3     | 0.6        | TEA       | 72:28     |
| 4     | 0.7        | TEA       | 75:25     |
| 5     | 0.8        | TEA       | 74:26     |
| 6     | 0.9        | TEA       | 75:25     |
| 7     | 1.0        | TEA       | 74:26     |
| 8     | 0          | imidazole | 75:25     |
| 9     | 0.5        | imidazole | 90:10     |
| 10    | 1.0        | imidazole | 91:9      |

#### S4. Characterization of *P*-Stereogenic Oxazaphospholidines **3**

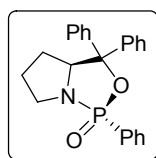

(*R*<sub>P</sub>)-**3a**: <sup>1</sup>H NMR (300 MHz, CDCl<sub>3</sub>): δ7.67-7.20 (m, 15H), 4.70 (dt, *J* = 12.8, 6.4 Hz, 1H), 3.84-3.64 (m, 1H), 3.10-2.87 (m, 1H), 1.91-1.44 (m, 4H); <sup>13</sup>C NMR (100 MHz, CDCl<sub>3</sub>): δ143.61 (d, *J* = 4.4 Hz), 141.17, 132.10, 131.67, 131.57, 130.30, 128.25, 128.09, 127.97, 127.37, 128.72, 128.53, 88.67, 71.27 (d, *J* = 7.2 Hz), 44.74, 30.14, 26.26; <sup>31</sup>P NMR (162 MHz, CDCl<sub>3</sub>): δ34.97.

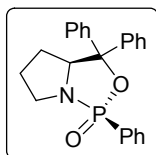

(*S<sub>P</sub>*)-**3a**: <sup>1</sup>H NMR (400 MHz, CDCl<sub>3</sub>): δ7.27-7.85 (m, 15H), 4.75 (ddd, *J* = 16.3, 10.8, 5.1 Hz, 1H), 3.23-2.98 (m, 2H), 1.55-1.85 (m, 3H), 1.39- 1.20 (m, 1H); <sup>13</sup>C NMR (100 MHz, CDCl<sub>3</sub>): δ144.76, 141.99 (d, *J* = 7.2 Hz), 133.18 (d, *J* = 10.1 Hz), 132.40, 128.76, 128.62, 128.48, 128.38, 128.17, 127.99, 127.39, 127.14, 126.32, 125.34, 89.77, 72.61 (d, *J* = 8.5 Hz), 44.43 (d, *J* = 2.0 Hz), 30.44, 24.66; <sup>31</sup>P NMR (162 MHz, CDCl<sub>3</sub>) δ33.32.

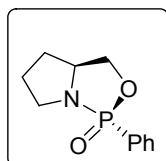

(*R<sub>P</sub>*)-**3b**: <sup>1</sup>H NMR (400 MHz, CDCl<sub>3</sub>): δ7.88-7.76 (m, 2H), 7.56-7.48 (m, 1H), 7.48-7.39 (m, 2H), 4.33 (ddd, *J* = 20.2, 8.6, 6.7 Hz, 1H), 4.11 (dd, *J* = 13.8, 6.7 Hz, 1H), 3.90 (td, *J* = 8.6, 2.2 Hz, 1H), 3.82-3.69 (m, 1H), 3.00-2.85 (m, 1H), 2.11-1.95 (m, 3H), 1.85-1.76 (m, 1H). <sup>13</sup>C NMR (100 MHz, CDCl<sub>3</sub>): δ132.00, 131.85, 131.69, 131.59, 128.41, 128.26, 69.68, 63.22 (d, *J* = 7.1 Hz), 45.36, 29.97, 27.56; <sup>31</sup>P NMR (162 MHz, CDCl<sub>3</sub>): δ38.40.

## S5. MS analysis of the reaction mixture

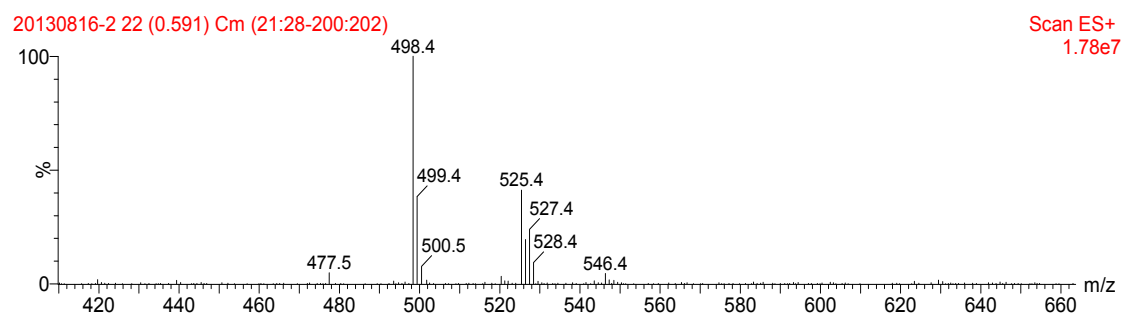

Figure S1 MS analysis of the reaction mixture of **2a** with **1**

## S6. NMR Traces

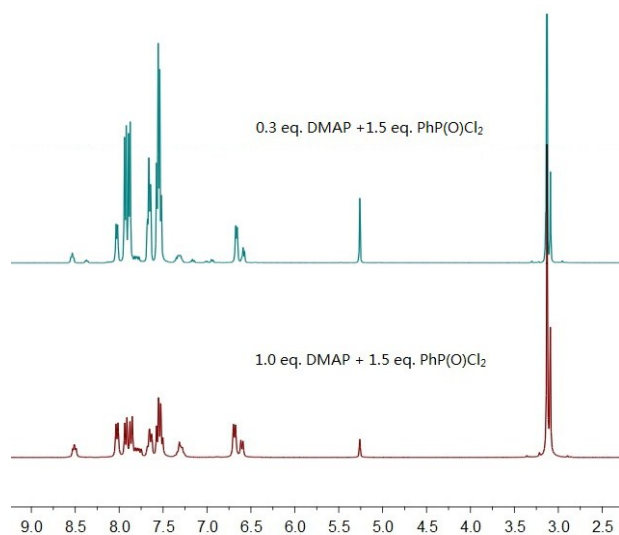

**Figure S2**  $^1\text{H}$  NMR spectra of mixtures of DMAP and phenylphosphoryl dichloride

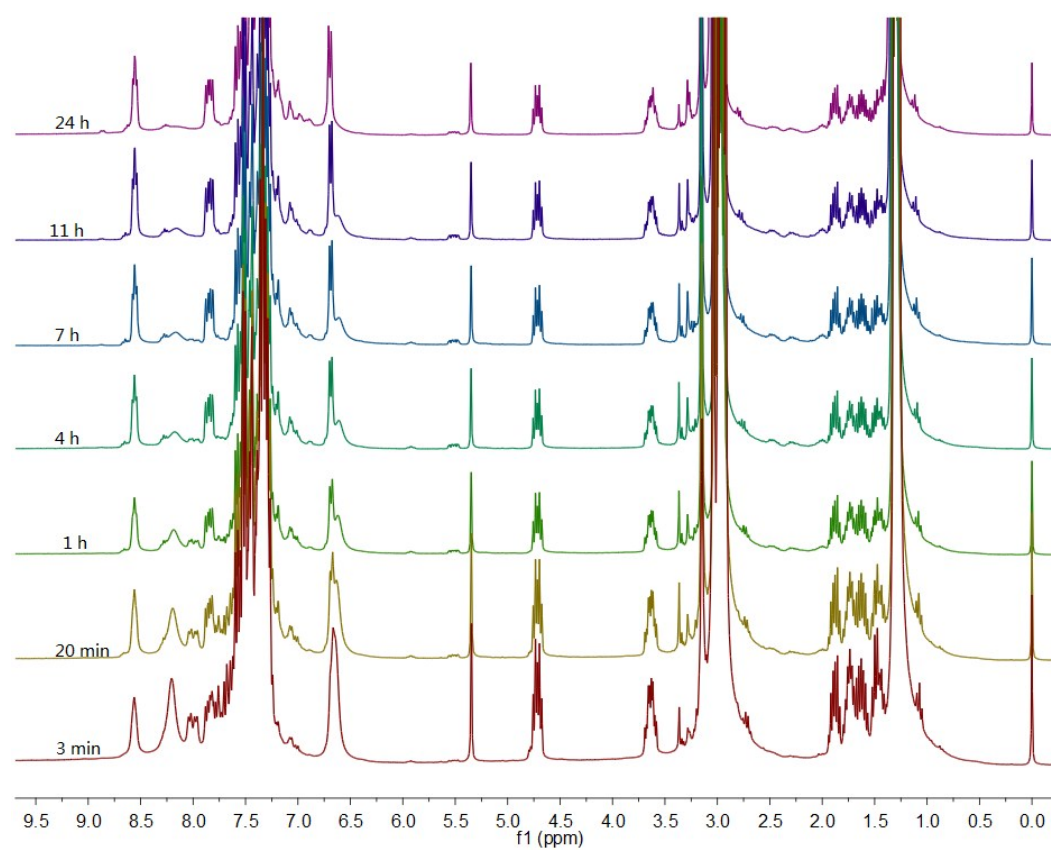

**Figure S3**  $^1\text{H}$  NMR traces of the reaction of **2a** with  $\text{PhP(O)Cl}_2$  in presence of 1.0 equiv DMAP

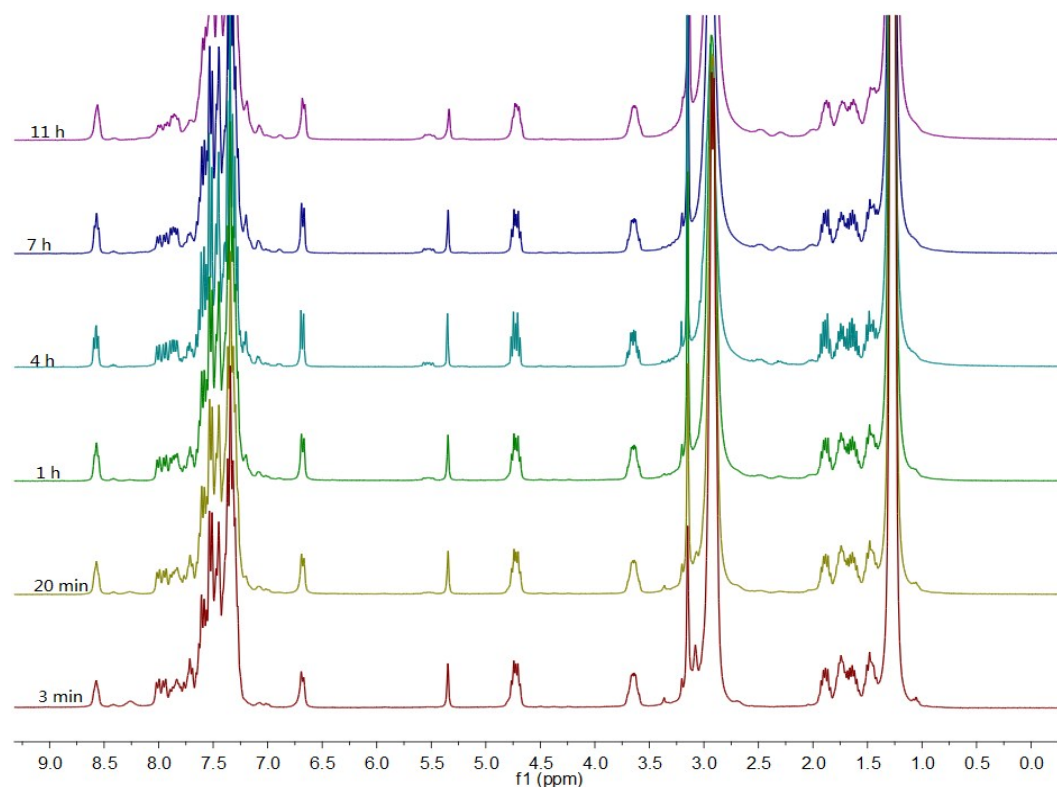

**Figure S4**  $^1\text{H}$  NMR traces of the reaction of **2a** with  $\text{PhP(O)Cl}_2$  in presence of 0.3 equiv DMAP

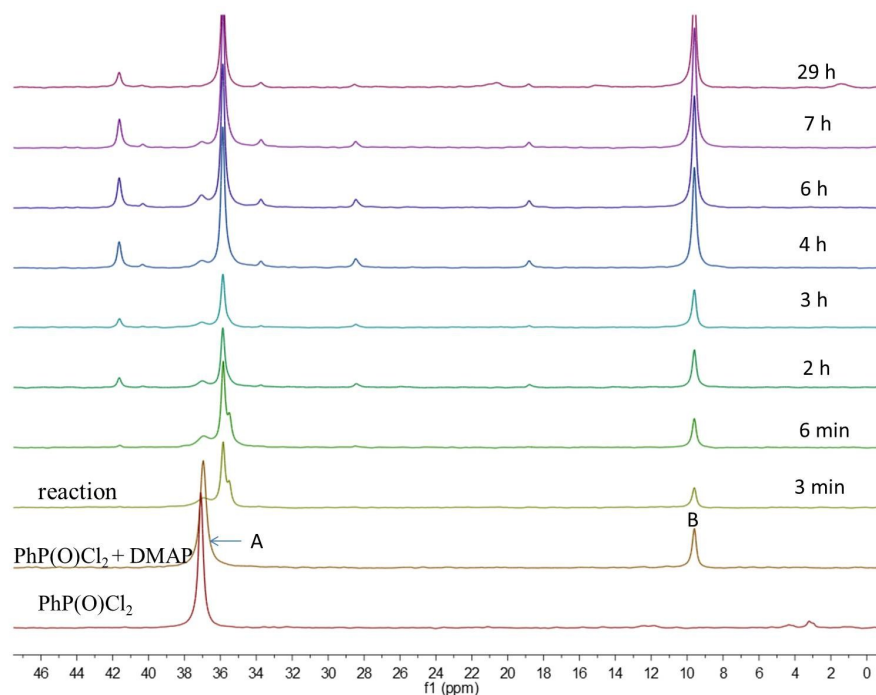

**Figure S5**  $^{31}\text{P}$  NMR traces of the reaction of **2a** with  $\text{PhP(O)Cl}_2$  in presence of 1.0 equiv DMAP. The bottom spectra was the substrate  $\text{PhP(O)Cl}_2$ . The second from bottom was the  $^{31}\text{P}$  NMR spectra of a mixture of  $\text{PhP(O)Cl}_2$  and DMAP. The others were the  $^{31}\text{P}$  NMR traces of the reaction of **2a** with  $\text{PhP(O)Cl}_2$ . A peak at 35.8 ppm was attributed to **C1** and ( $R_p$ )-**3a**. The tiny shoulder peak was probably an unspecified intermediate. No peak related to epimer of **C1** or ( $R_p$ )-**3a** was



observed.

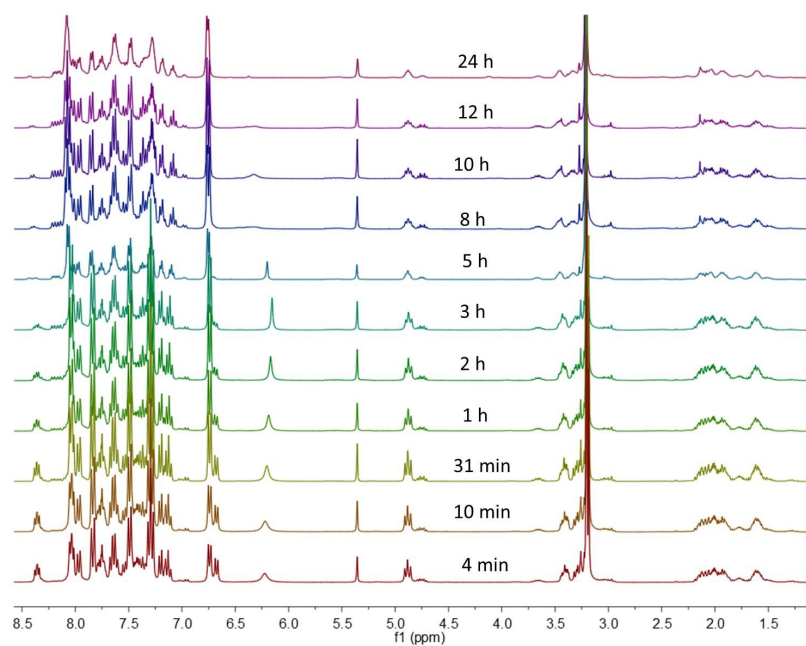

**Figure S6** <sup>1</sup>H NMR traces of the reaction of **2a** with PhP(O)Cl<sub>2</sub> in presence of DMAP but without TEA

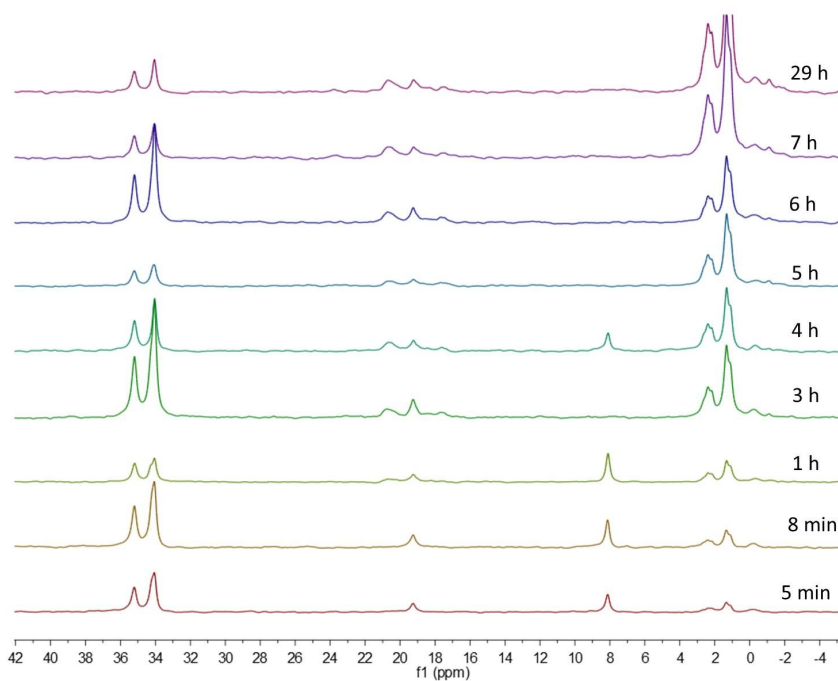

**Figure S7** <sup>31</sup>P NMR traces of the reaction of **2a** with PhP(O)Cl<sub>2</sub> in presence of DMAP but without TEA

## S7. NMR Spectra

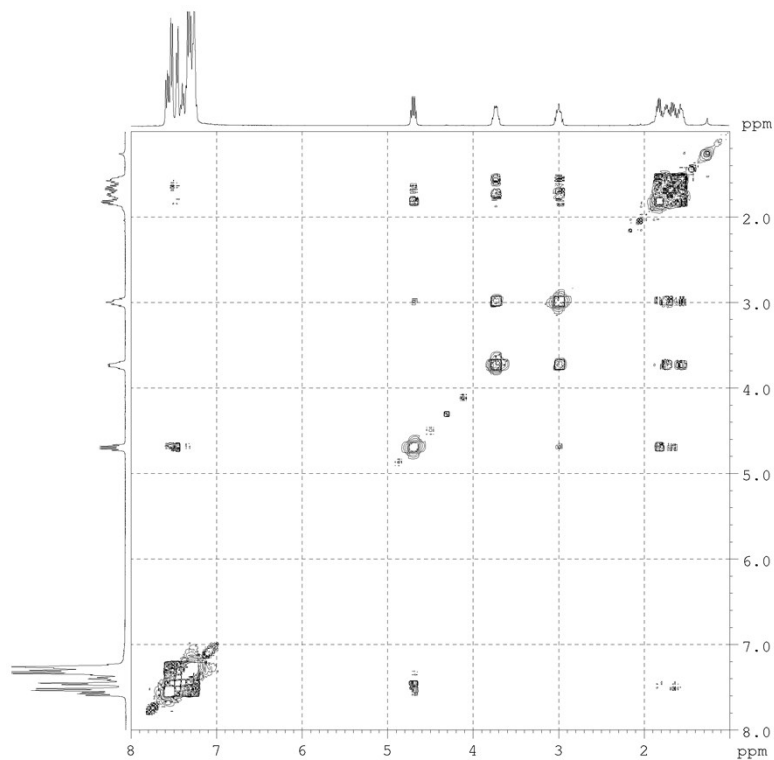

Figure S8 NOESY spectra of (*R<sub>p</sub>*)-**3a**

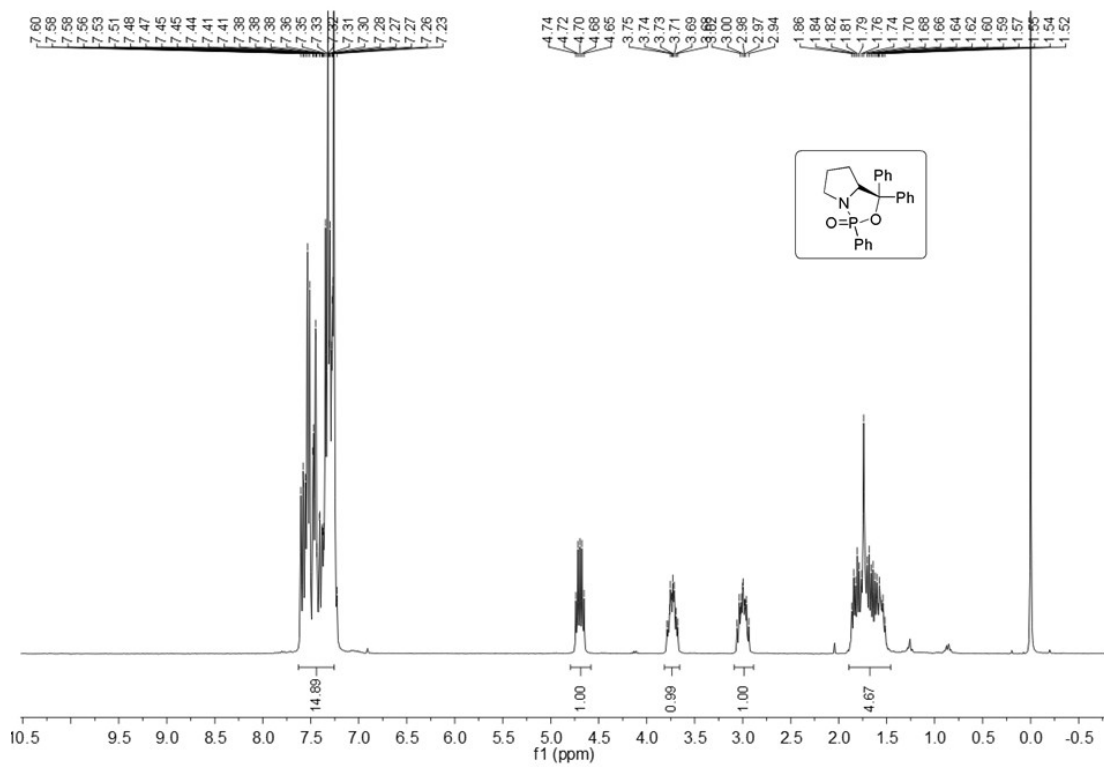

Figure S9 <sup>1</sup>H NMR of (*R<sub>p</sub>*)-**3a**

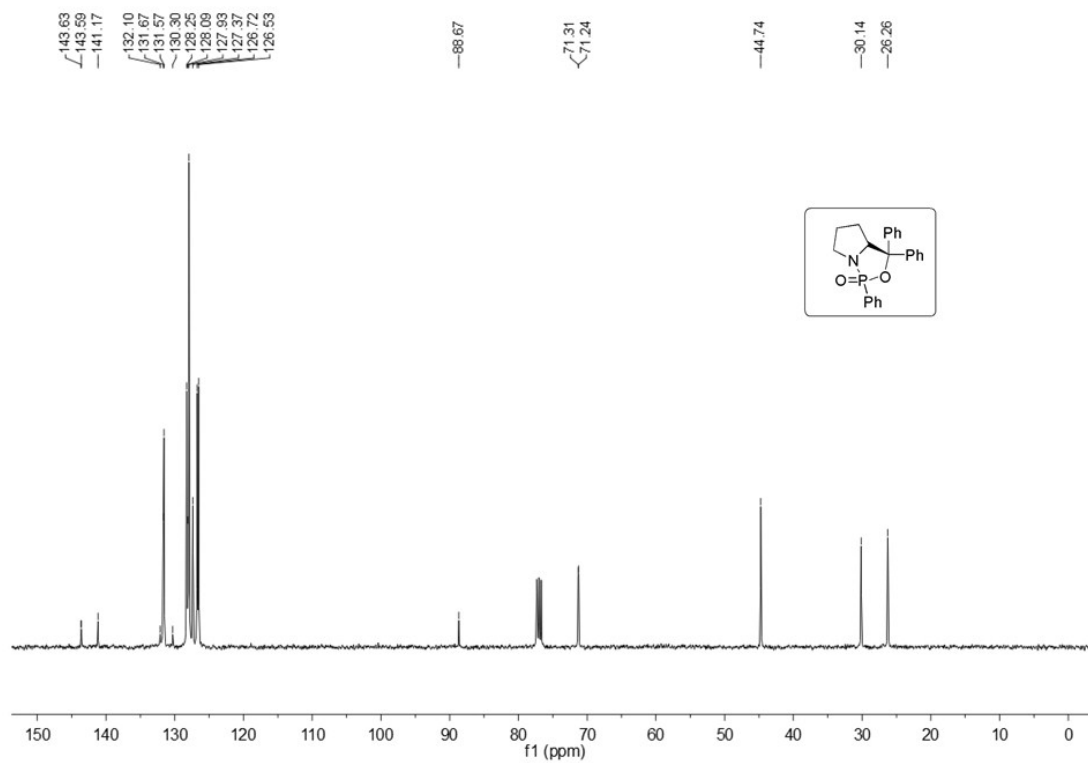

Figure S10  $^{13}\text{C}$  NMR of  $(R_p)$ -3a

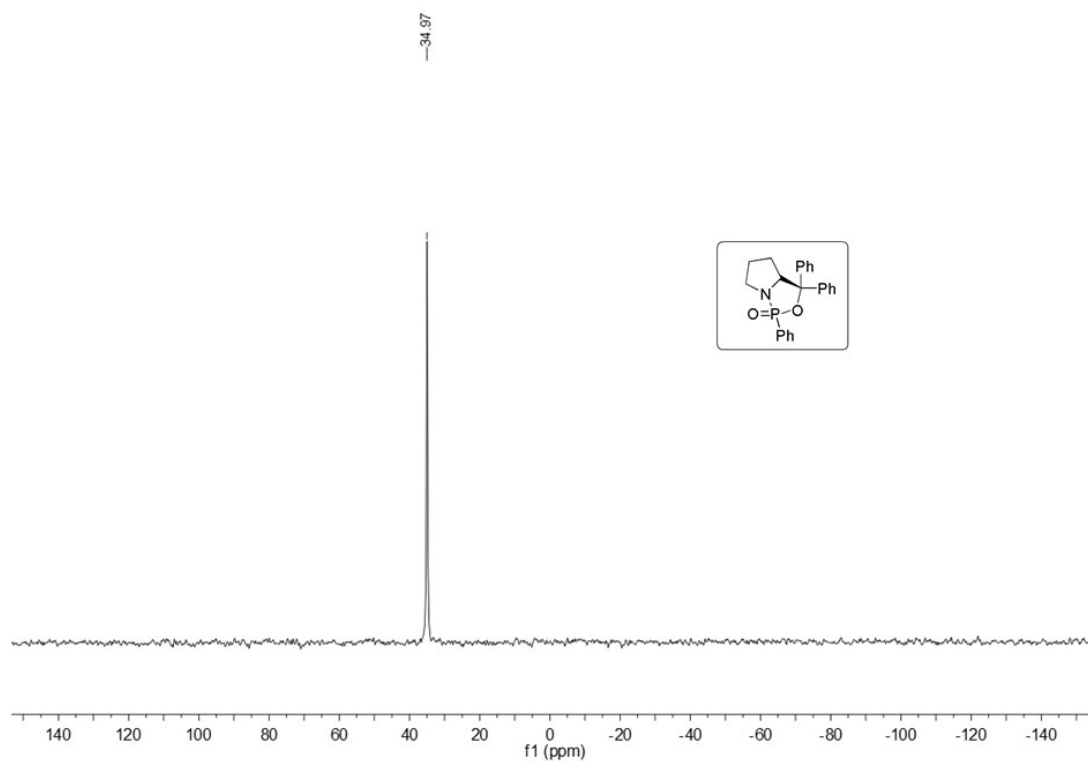

Figure S11  $^{31}\text{P}$  NMR of  $(R_p)$ -3a

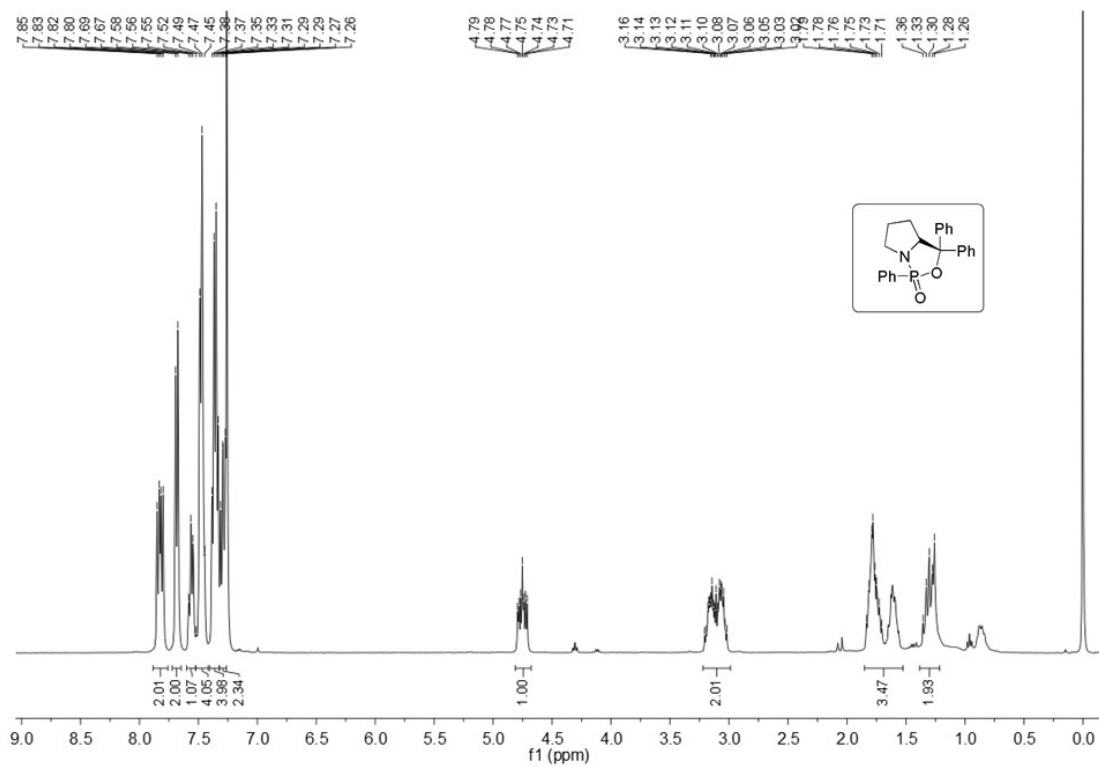

Figure S12  $^1\text{H}$  NMR of  $(S_P)$ -3a

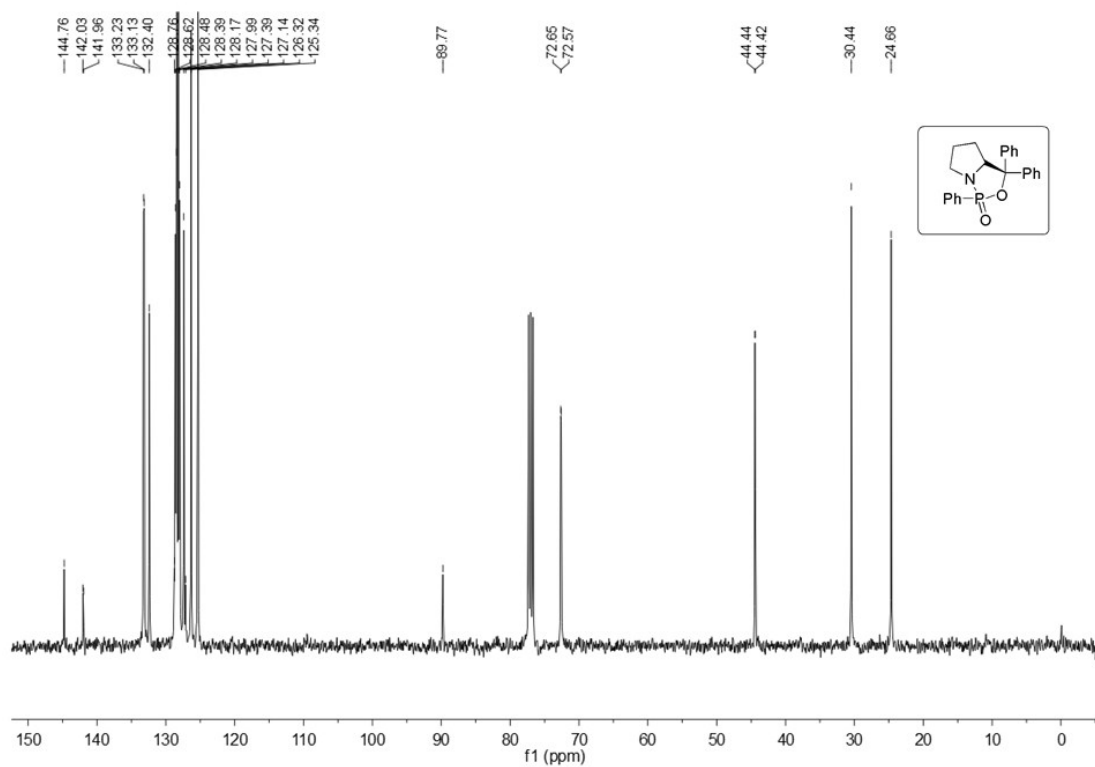

Figure S13  $^{13}\text{C}$  NMR of  $(S_P)$ -3a

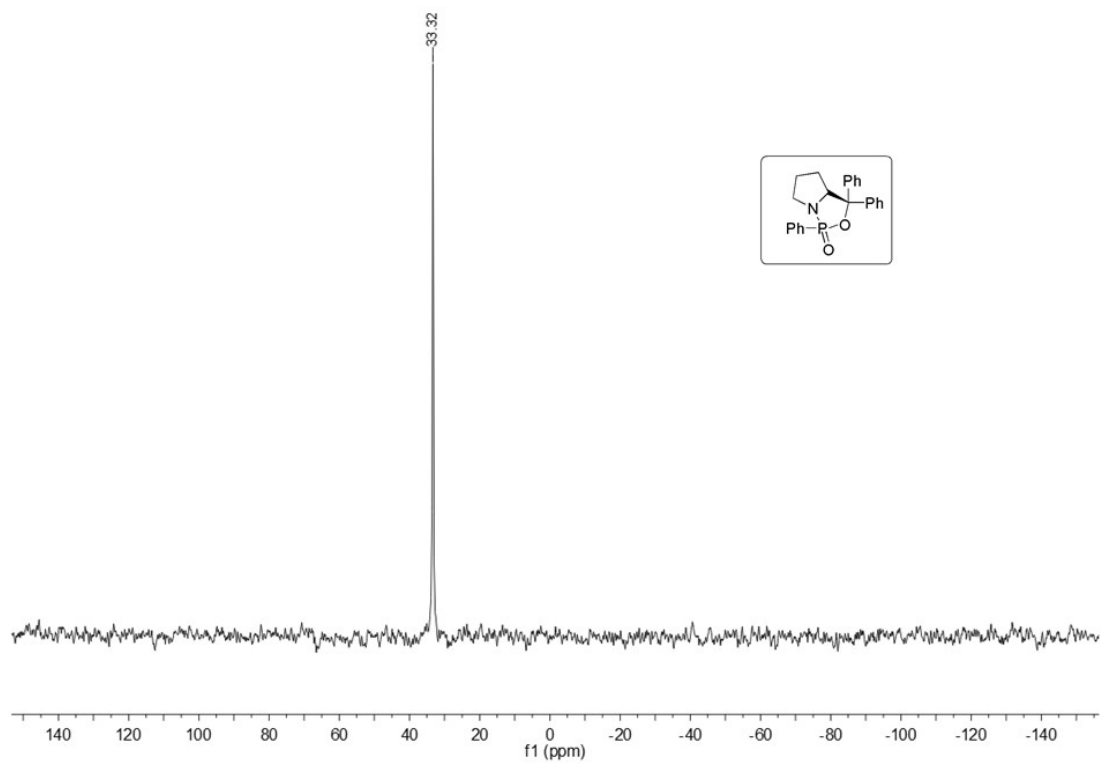

Figure S14  $^{31}\text{P}$  NMR of  $(S_P)$ -3a

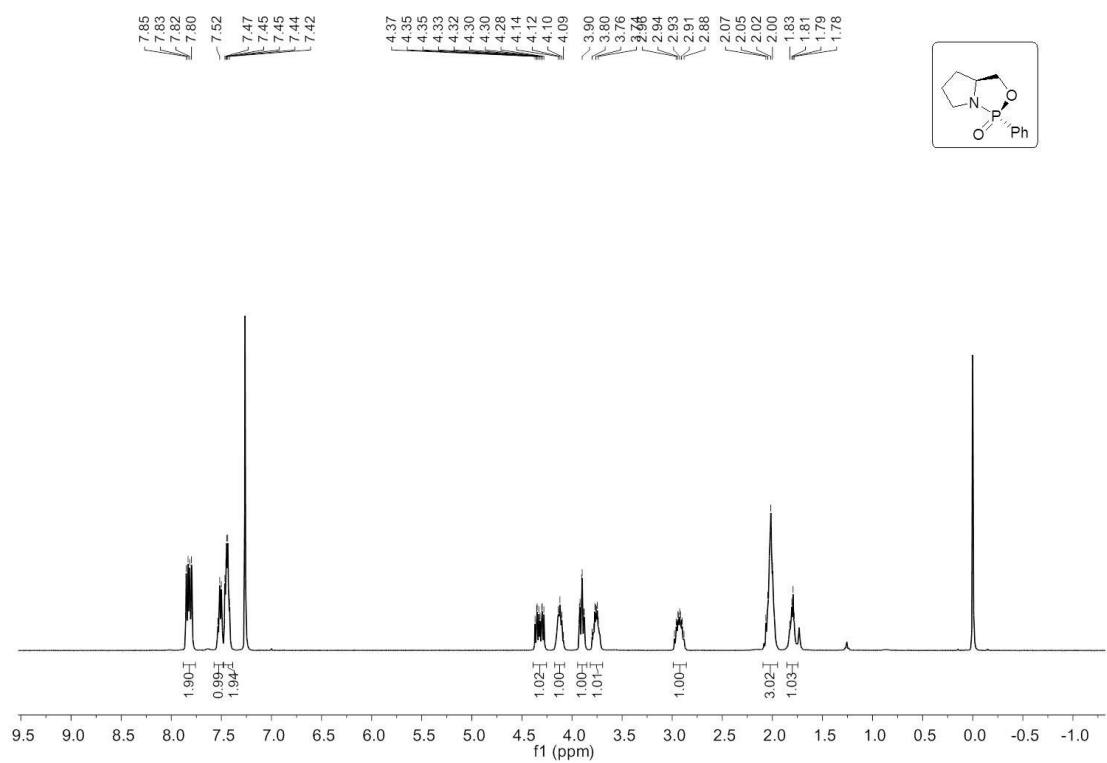

Figure S15  $^1\text{H}$  NMR of  $(R_P)$ -3b

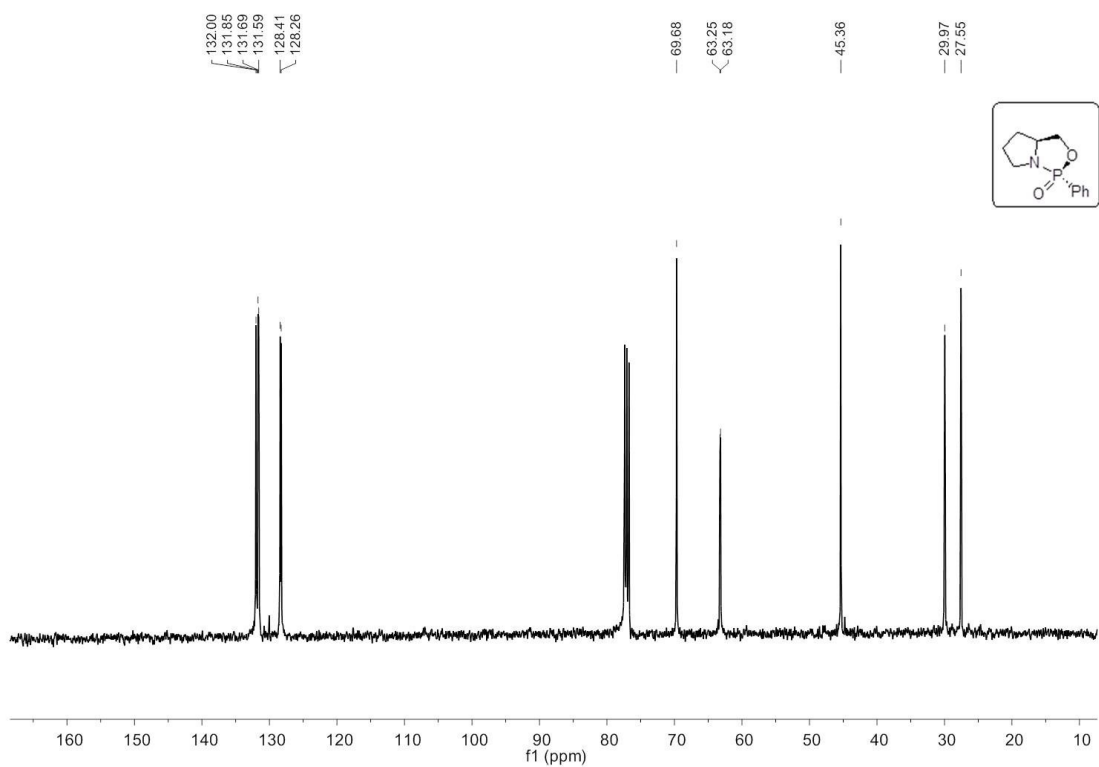

**Figure S16**  $^{13}\text{C}$  NMR of (*R<sub>p</sub>*)-**3b**

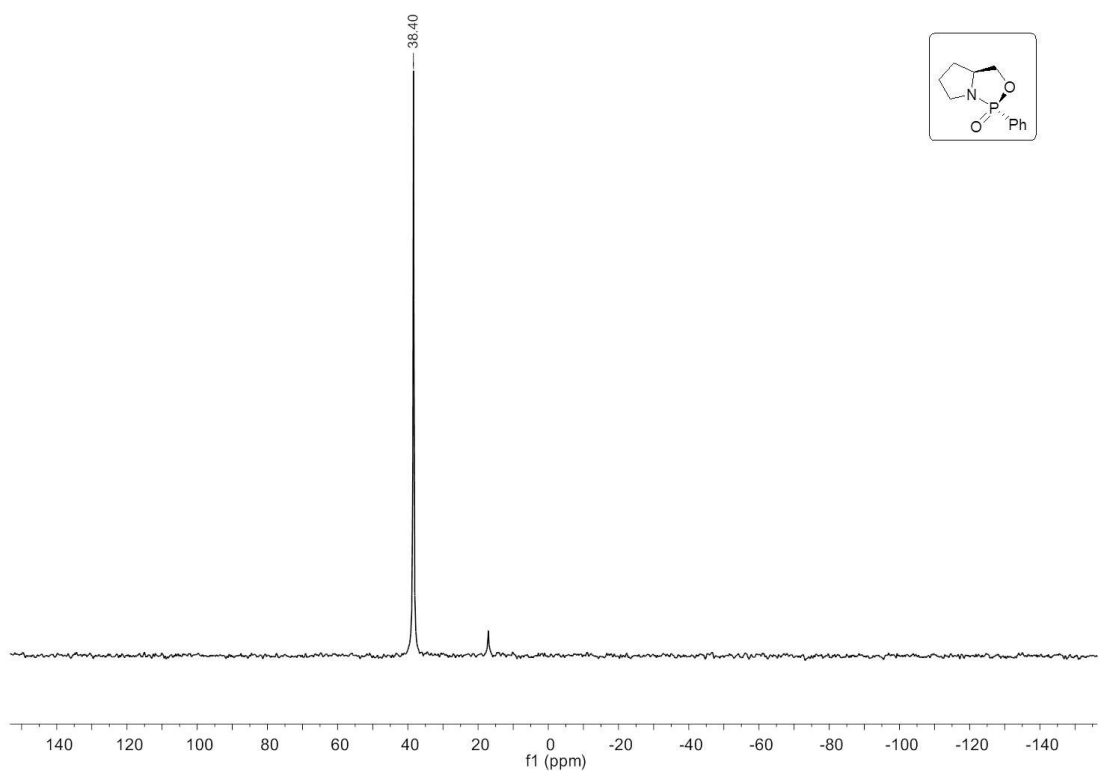

**Figure S17**  $^{31}\text{P}$  NMR of (*R<sub>p</sub>*)-**3b**

### S8. Computational Details

All calculations were performed using Gaussian 09 package. Geometries were optimized

using B3LYP density functional with a basis set of 6-31G (d,p) in solvent phase considering calculation cost and practical possibility for the size of investigated system. Solvent (DCM) effects were calculated by using the PCM solvation model. All charge distributions were calculated by Natural Bond Orbital (NBO) analysis. All energies reported here are in Kcal/mol, and bond lengths are in angstroms (Å).

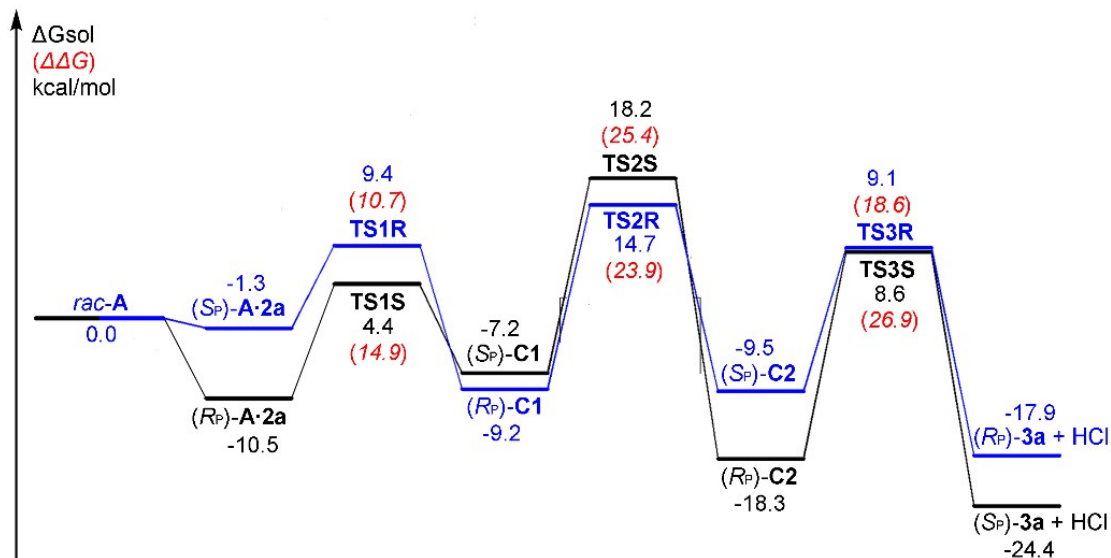

**Figure S18** Reaction energy profile and geometries of stationary points and transition states

**Table S4** Geometries of stationary points and transition states

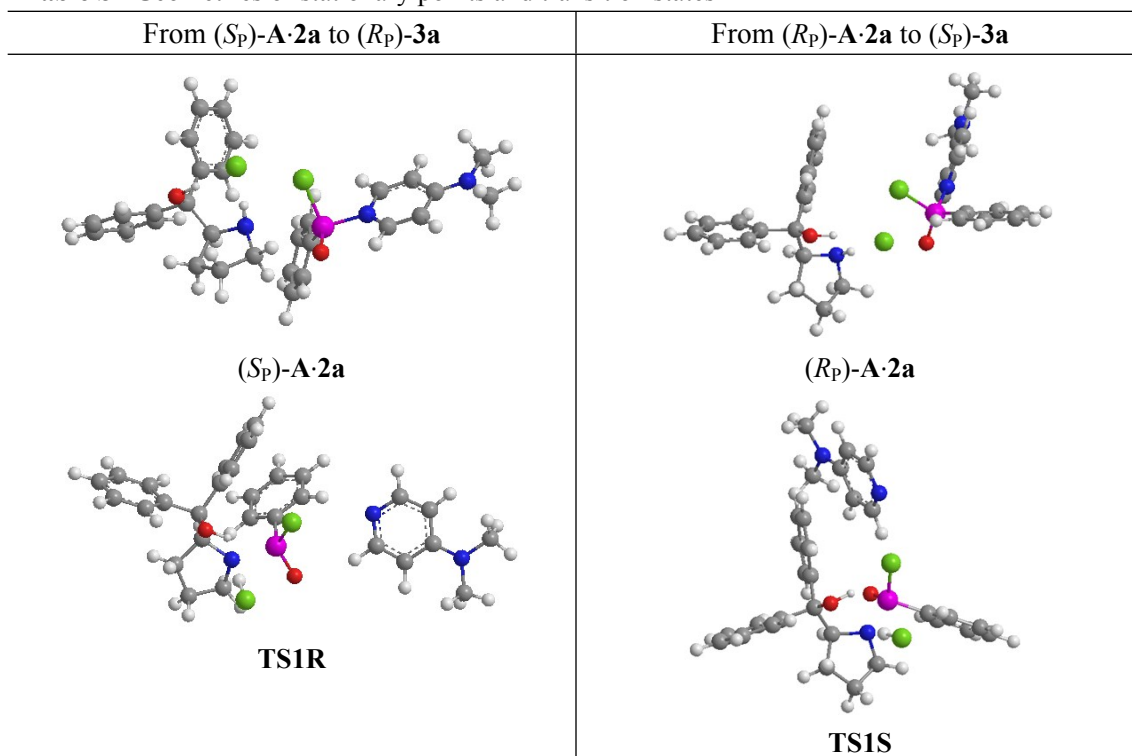

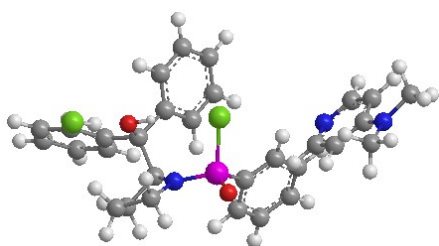

**(*R<sub>p</sub>*)-C1**

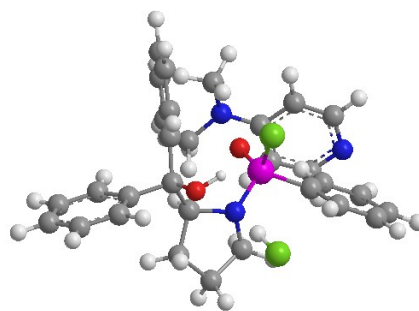

**(*S<sub>p</sub>*)-C1**

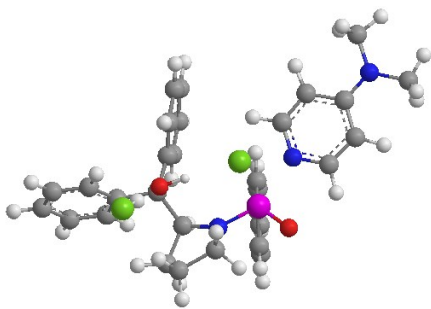

**TS2R**

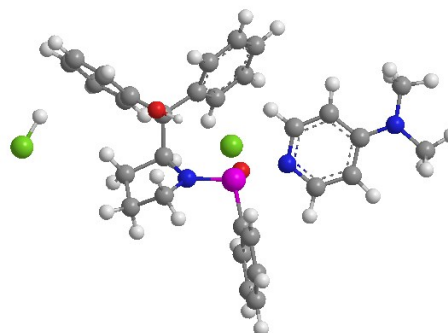

**TS2S**

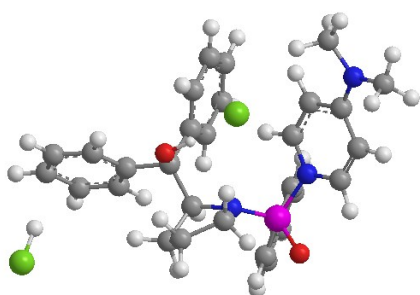

**(*S<sub>p</sub>*)-C2**

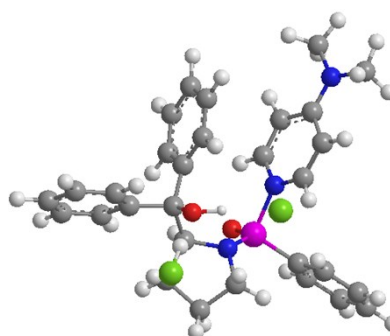

**(*R<sub>p</sub>*)-C2**

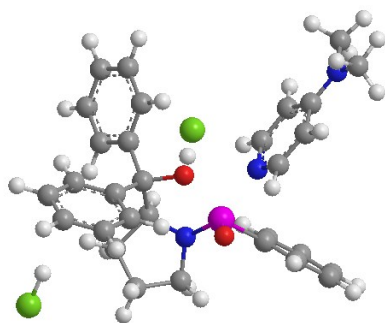

**TS3R**

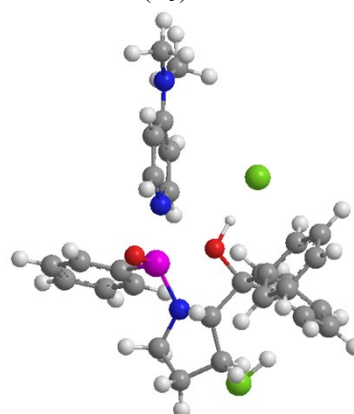

**TS3S**

**Table S5** Cartesian coordinates (in Å) and the sum of electronic and thermal Free Energies

|                                                                     |                                              |
|---------------------------------------------------------------------|----------------------------------------------|
| <p><b>(<i>S<sub>p</sub></i>)-A·2a</b><br/>Energy = -2739.704519</p> | <p><b>TS1R</b><br/>Energy = -2739.687400</p> |
|---------------------------------------------------------------------|----------------------------------------------|



|       |        |        |        |       |        |        |        |
|-------|--------|--------|--------|-------|--------|--------|--------|
|       |        |        |        |       |        |        |        |
| Cl(1) | -2.624 | -5.199 | -0.622 | Cl(1) | -1.601 | 4.280  | -0.487 |
| Cl(2) | 0.613  | -1.401 | 0.762  | H(59) | -1.850 | 3.103  | 0.168  |
| P(3)  | 1.368  | -0.389 | -0.814 | Cl(2) | 0.008  | 0.654  | -0.940 |
| O(4)  | 1.107  | -0.853 | -2.198 | P(3)  | -0.312 | 0.863  | 1.070  |
| C(5)  | 1.132  | 1.379  | -0.540 | O(4)  | 0.644  | 1.793  | 1.724  |
| C(6)  | 0.774  | 2.102  | -1.691 | C(5)  | -0.355 | -0.810 | 1.769  |
| C(7)  | 1.243  | 2.035  | 0.698  | C(6)  | 0.636  | -1.726 | 1.387  |
| C(8)  | 0.553  | 3.476  | -1.603 | C(7)  | -1.263 | -1.133 | 2.790  |
| C(9)  | 1.034  | 3.411  | 0.769  | C(8)  | 0.688  | -2.972 | 2.013  |
| C(10) | 0.688  | 4.130  | -0.379 | C(9)  | -1.203 | -2.384 | 3.402  |
| N(16) | 6.984  | -2.113 | 0.143  | C(10) | -0.231 | -3.306 | 3.009  |
| N(17) | 3.102  | -0.760 | -0.498 | H(11) | 1.389  | -1.468 | 0.644  |
| C(18) | 5.727  | -1.670 | -0.059 | H(12) | -2.013 | -0.420 | 3.111  |
| C(19) | 7.722  | -1.773 | 1.362  | H(13) | 1.459  | -3.678 | 1.722  |
| C(20) | 7.688  | -2.828 | -0.923 | H(14) | -1.910 | -2.634 | 4.186  |
| C(21) | 5.018  | -0.908 | 0.919  | H(15) | -0.185 | -4.280 | 3.487  |
| C(22) | 5.025  | -1.941 | -1.272 | N(16) | 7.259  | 1.094  | -0.679 |
| C(23) | 3.740  | -0.494 | 0.682  | N(17) | 3.497  | -0.711 | -0.011 |
| C(24) | 3.749  | -1.489 | -1.454 | C(18) | 6.039  | 0.503  | -0.455 |
| H(11) | 0.655  | 1.578  | -2.632 | C(19) | 8.309  | 0.349  | -1.354 |
| H(12) | 1.472  | 1.487  | 1.608  | C(20) | 7.564  | 2.376  | -0.065 |
| H(13) | 0.268  | 4.030  | -2.492 | C(21) | 5.725  | -0.783 | -0.954 |
| H(14) | 1.123  | 3.921  | 1.723  | C(22) | 5.019  | 1.145  | 0.285  |
| H(15) | 0.512  | 5.199  | -0.314 | C(23) | 4.469  | -1.319 | -0.707 |
| H(25) | 8.577  | -2.440 | 1.452  | C(24) | 3.800  | 0.508  | 0.468  |
| H(26) | 7.097  | -1.916 | 2.246  | H(25) | 9.188  | 0.985  | -1.462 |
| H(27) | 8.079  | -0.735 | 1.340  | H(26) | 7.996  | 0.040  | -2.359 |
| H(28) | 7.158  | -3.746 | -1.195 | H(27) | 8.605  | -0.553 | -0.799 |
| H(29) | 8.682  | -3.099 | -0.572 | H(28) | 6.845  | 3.144  | -0.373 |
| H(30) | 7.797  | -2.203 | -1.817 | H(29) | 8.554  | 2.700  | -0.383 |
| H(31) | 5.458  | -0.659 | 1.873  | H(30) | 7.556  | 2.325  | 1.034  |
| H(32) | 5.472  | -2.516 | -2.069 | H(31) | 6.442  | -1.359 | -1.525 |
| H(33) | 3.180  | 0.053  | 1.426  | H(32) | 5.165  | 2.128  | 0.714  |
| H(34) | 3.161  | -1.696 | -2.341 | H(33) | 4.231  | -2.308 | -1.097 |
| O(35) | -4.724 | -2.897 | -0.647 | H(34) | 3.016  | 1.011  | 1.031  |
| N(36) | -1.966 | -1.988 | -1.568 | O(35) | -3.629 | 1.776  | -1.417 |
| C(37) | -3.192 | -1.166 | -1.425 | N(36) | -2.111 | 1.735  | 1.100  |
| C(38) | -4.145 | -1.663 | -0.284 | C(37) | -3.444 | 1.063  | 0.904  |
| C(39) | -3.906 | -1.157 | -2.819 | C(38) | -3.832 | 0.659  | -0.567 |
| C(40) | -3.183 | -2.248 | -3.623 | C(39) | -4.414 | 2.155  | 1.437  |
| C(41) | -1.775 | -2.223 | -3.012 | C(40) | -3.618 | 3.018  | 2.440  |
| C(42) | -5.296 | -0.643 | -0.145 | C(41) | -2.199 | 2.435  | 2.422  |

|                                                    |        |        |        |                                      |        |        |        |
|----------------------------------------------------|--------|--------|--------|--------------------------------------|--------|--------|--------|
| C(43)                                              | -3.469 | -1.765 | 1.102  | C(42)                                | -5.353 | 0.373  | -0.601 |
| C(44)                                              | -5.051 | 0.686  | 0.231  | C(43)                                | -3.132 | -0.591 | -1.142 |
| C(45)                                              | -3.946 | -2.711 | 2.022  | C(44)                                | -5.910 | -0.668 | 0.156  |
| C(46)                                              | -6.618 | -1.028 | -0.394 | C(45)                                | -2.900 | -0.646 | -2.525 |
| C(47)                                              | -2.457 | -0.898 | 1.521  | C(46)                                | -6.202 | 1.147  | -1.400 |
| C(48)                                              | -6.093 | 1.605  | 0.346  | C(47)                                | -2.813 | -1.716 | -0.374 |
| C(49)                                              | -3.417 | -2.793 | 3.308  | C(48)                                | -7.280 | -0.921 | 0.125  |
| C(50)                                              | -7.663 | -0.109 | -0.277 | C(49)                                | -2.346 | -1.780 | -3.114 |
| C(51)                                              | -1.917 | -0.982 | 2.808  | C(50)                                | -7.574 | 0.887  | -1.437 |
| C(52)                                              | -7.408 | 1.211  | 0.091  | C(51)                                | -2.258 | -2.854 | -0.963 |
| C(53)                                              | -2.390 | -1.935 | 3.708  | C(52)                                | -8.121 | -0.143 | -0.674 |
| H(62)                                              | -4.049 | -3.629 | -0.619 | C(53)                                | -2.018 | -2.891 | -2.334 |
| H(59)                                              | -2.097 | -2.914 | -1.134 | H(62)                                | -2.688 | 2.004  | -1.429 |
| H(54)                                              | -2.891 | -0.136 | -1.187 | H(54)                                | -3.511 | 0.175  | 1.545  |
| H(55)                                              | -3.776 | -0.177 | -3.296 | H(55)                                | -5.300 | 1.695  | 1.878  |
| H(56)                                              | -4.977 | -1.343 | -2.732 | H(56)                                | -4.743 | 2.762  | 0.592  |
| H(57)                                              | -3.644 | -3.222 | -3.428 | H(57)                                | -3.606 | 4.063  | 2.123  |
| H(58)                                              | -3.201 | -2.065 | -4.705 | H(58)                                | -4.036 | 2.983  | 3.449  |
| H(60)                                              | -1.214 | -3.151 | -3.162 | H(60)                                | -1.408 | 3.184  | 2.481  |
| H(61)                                              | -1.185 | -1.402 | -3.447 | H(61)                                | -2.060 | 1.737  | 3.258  |
| H(63)                                              | -4.039 | 1.007  | 0.457  | H(63)                                | -5.273 | -1.301 | 0.766  |
| H(64)                                              | -4.730 | -3.389 | 1.705  | H(64)                                | -3.159 | 0.213  | -3.133 |
| H(65)                                              | -6.806 | -2.057 | -0.676 | H(65)                                | -5.782 | 1.951  | -1.991 |
| H(66)                                              | -2.052 | -0.176 | 0.822  | H(66)                                | -2.983 | -1.723 | 0.696  |
| H(67)                                              | -5.877 | 2.628  | 0.644  | H(67)                                | -7.690 | -1.732 | 0.721  |
| H(68)                                              | -3.805 | -3.536 | 4.001  | H(68)                                | -2.172 | -1.796 | -4.186 |
| H(69)                                              | -8.682 | -0.432 | -0.474 | H(69)                                | -8.215 | 1.499  | -2.066 |
| H(70)                                              | -1.109 | -0.313 | 3.098  | H(70)                                | -2.008 | -3.708 | -0.340 |
| H(71)                                              | -8.222 | 1.925  | 0.184  | H(71)                                | -9.188 | -0.343 | -0.703 |
| H(72)                                              | -1.963 | -2.007 | 4.705  | H(72)                                | -1.584 | -3.775 | -2.793 |
| <b>(R<sub>p</sub>)-C1</b><br>Energy = -2739.717128 |        |        |        | <b>TS2R</b><br>Energy = -2739.679009 |        |        |        |
| Cl(1)                                              | -4.146 | 4.843  | -0.328 | Cl(1)                                | -5.002 | -4.598 | -2.099 |
| H(59)                                              | -3.928 | 3.554  | -0.255 | H(59)                                | -4.233 | -3.696 | -1.529 |
| Cl(2)                                              | -0.018 | 0.998  | -0.357 | Cl(2)                                | -0.119 | -3.213 | -1.434 |
| P(3)                                               | -0.379 | 0.689  | 1.706  | P(3)                                 | 0.136  | -0.738 | -2.066 |
| O(4)                                               | 0.547  | 1.551  | 2.492  | O(4)                                 | 0.746  | -0.787 | -3.431 |
| C(5)                                               | -0.194 | -1.098 | 1.937  | C(5)                                 | 0.313  | 0.915  | -1.240 |
| C(6)                                               | 0.721  | -1.848 | 1.186  | C(6)                                 | 0.837  | 1.195  | 0.025  |
| C(7)                                               | -0.869 | -1.693 | 3.016  | C(7)                                 | -0.073 | 1.987  | -2.067 |
| C(8)                                               | 0.924  | -3.193 | 1.495  | C(8)                                 | 0.959  | 2.515  | 0.464  |
| C(9)                                               | -0.667 | -3.040 | 3.310  | C(9)                                 | 0.062  | 3.304  | -1.631 |

|       |        |        |        |       |        |        |        |
|-------|--------|--------|--------|-------|--------|--------|--------|
| C(10) | 0.225  | -3.794 | 2.543  | C(10) | 0.575  | 3.572  | -0.360 |
| O(35) | -3.453 | 1.790  | -0.265 | O(35) | -3.072 | -2.593 | -0.726 |
| N(36) | -1.977 | 1.091  | 1.943  | N(36) | -1.549 | -0.725 | -2.204 |
| C(37) | -3.223 | 0.329  | 1.694  | C(37) | -2.597 | -0.249 | -1.278 |
| C(38) | -3.770 | 0.468  | 0.207  | C(38) | -3.020 | -1.288 | -0.151 |
| C(39) | -4.140 | 0.910  | 2.794  | C(39) | -3.717 | 0.090  | -2.291 |
| C(40) | -3.767 | 2.395  | 2.863  | C(40) | -3.625 | -1.005 | -3.365 |
| C(41) | -2.259 | 2.424  | 2.562  | C(41) | -2.136 | -1.395 | -3.397 |
| C(42) | -5.297 | 0.306  | 0.160  | C(42) | -4.414 | -0.980 | 0.430  |
| C(43) | -3.165 | -0.556 | -0.783 | C(43) | -2.060 | -1.294 | 1.069  |
| C(44) | -5.875 | -0.923 | 0.514  | C(44) | -4.809 | 0.334  | 0.728  |
| C(45) | -3.110 | -0.205 | -2.142 | C(45) | -1.660 | -2.510 | 1.641  |
| C(46) | -6.140 | 1.351  | -0.231 | C(46) | -5.290 | -2.023 | 0.750  |
| C(47) | -2.754 | -1.844 | -0.417 | C(47) | -1.678 | -0.109 | 1.713  |
| C(48) | -7.257 | -1.095 | 0.496  | C(48) | -6.047 | 0.596  | 1.313  |
| C(49) | -2.639 | -1.102 | -3.097 | C(49) | -0.889 | -2.539 | 2.804  |
| C(50) | -7.526 | 1.176  | -0.256 | C(50) | -6.531 | -1.761 | 1.334  |
| C(51) | -2.282 | -2.744 | -1.375 | C(51) | -0.910 | -0.135 | 2.878  |
| C(52) | -8.092 | -0.043 | 0.111  | C(52) | -6.917 | -0.452 | 1.618  |
| C(53) | -2.219 | -2.378 | -2.717 | C(53) | -0.508 | -1.351 | 3.430  |
| H(11) | 1.308  | -1.390 | 0.394  | H(11) | 1.143  | 0.395  | 0.685  |
| H(12) | -1.541 | -1.102 | 3.630  | H(12) | -0.465 | 1.785  | -3.057 |
| H(13) | 1.640  | -3.768 | 0.916  | H(13) | 1.359  | 2.713  | 1.454  |
| H(14) | -1.197 | -3.498 | 4.140  | H(14) | -0.231 | 4.118  | -2.286 |
| H(15) | 0.386  | -4.843 | 2.774  | H(15) | 0.679  | 4.598  | -0.018 |
| H(62) | -2.487 | 1.820  | -0.367 | H(62) | -2.156 | -2.859 | -0.981 |
| H(54) | -3.044 | -0.728 | 1.888  | H(54) | -2.242 | 0.658  | -0.786 |
| H(55) | -3.884 | 0.414  | 3.738  | H(55) | -3.485 | 1.069  | -2.726 |
| H(56) | -5.199 | 0.739  | 2.605  | H(56) | -4.704 | 0.154  | -1.836 |
| H(57) | -4.318 | 2.962  | 2.110  | H(57) | -4.241 | -1.863 | -3.091 |
| H(58) | -3.991 | 2.836  | 3.838  | H(58) | -3.969 | -0.650 | -4.341 |
| H(60) | -1.995 | 3.240  | 1.882  | H(60) | -1.986 | -2.477 | -3.357 |
| H(61) | -1.648 | 2.532  | 3.461  | H(61) | -1.612 | -1.023 | -4.281 |
| H(63) | -5.243 | -1.759 | 0.794  | H(63) | -4.156 | 1.169  | 0.498  |
| H(64) | -3.438 | 0.782  | -2.445 | H(64) | -1.958 | -3.440 | 1.174  |
| H(65) | -5.723 | 2.305  | -0.526 | H(65) | -5.002 | -3.046 | 0.546  |
| H(66) | -2.780 | -2.170 | 0.616  | H(66) | -1.985 | 0.854  | 1.321  |
| H(67) | -7.682 | -2.055 | 0.775  | H(67) | -6.332 | 1.622  | 1.527  |
| H(68) | -2.601 | -0.803 | -4.140 | H(68) | -0.596 | -3.497 | 3.224  |
| H(69) | -8.160 | 2.001  | -0.565 | H(69) | -7.195 | -2.589 | 1.565  |
| H(70) | -1.956 | -3.732 | -1.061 | H(70) | -0.633 | 0.801  | 3.355  |
| H(71) | -9.169 | -0.177 | 0.091  | H(71) | -7.883 | -0.249 | 2.071  |
| H(72) | -1.849 | -3.078 | -3.460 | H(72) | 0.083  | -1.373 | 4.341  |

|                                                    |        |        |        |                                      |        |        |        |
|----------------------------------------------------|--------|--------|--------|--------------------------------------|--------|--------|--------|
| N(16)                                              | 7.248  | 1.569  | 0.152  | N(16)                                | 5.818  | -2.295 | 0.357  |
| N(17)                                              | 3.577  | -0.531 | 0.007  | N(17)                                | 2.011  | -1.295 | -1.072 |
| C(18)                                              | 6.048  | 0.893  | 0.096  | C(18)                                | 4.576  | -1.971 | -0.112 |
| C(19)                                              | 8.285  | 1.281  | -0.824 | C(19)                                | 5.961  | -2.956 | 1.648  |
| C(20)                                              | 7.360  | 2.769  | 0.967  | C(20)                                | 6.990  | -2.096 | -0.484 |
| C(21)                                              | 5.837  | -0.188 | -0.791 | C(21)                                | 3.403  | -2.198 | 0.654  |
| C(22)                                              | 4.955  | 1.233  | 0.925  | C(22)                                | 4.382  | -1.397 | -1.392 |
| C(23)                                              | 4.612  | -0.843 | -0.785 | C(23)                                | 2.167  | -1.860 | 0.139  |
| C(24)                                              | 3.776  | 0.504  | 0.841  | C(24)                                | 3.106  | -1.080 | -1.820 |
| H(25)                                              | 9.169  | 1.877  | -0.593 | H(25)                                | 7.019  | -3.126 | 1.846  |
| H(26)                                              | 7.975  | 1.514  | -1.854 | H(26)                                | 5.449  | -3.926 | 1.670  |
| H(27)                                              | 8.578  | 0.226  | -0.789 | H(27)                                | 5.562  | -2.338 | 2.461  |
| H(28)                                              | 6.687  | 3.572  | 0.632  | H(28)                                | 6.952  | -2.709 | -1.394 |
| H(29)                                              | 8.385  | 3.140  | 0.917  | H(29)                                | 7.883  | -2.375 | 0.076  |
| H(30)                                              | 7.135  | 2.555  | 2.018  | H(30)                                | 7.094  | -1.046 | -0.781 |
| H(31)                                              | 6.605  | -0.515 | -1.480 | H(31)                                | 3.446  | -2.650 | 1.635  |
| H(32)                                              | 5.009  | 2.057  | 1.625  | H(32)                                | 5.211  | -1.208 | -2.060 |
| Cl(1)                                              | -4.146 | 4.843  | -0.328 | H(33)                                | 1.262  | -2.066 | 0.699  |
| H(59)                                              | -3.928 | 3.554  | -0.255 | H(34)                                | 2.916  | -0.666 | -2.804 |
| <b>(R<sub>p</sub>)-C2</b><br>Energy = -2739.717631 |        |        |        | <b>TS3R</b><br>Energy = -2739.687870 |        |        |        |
| Cl(1)                                              | -7.162 | -2.362 | -2.500 | Cl(1)                                | -6.956 | 1.150  | -1.223 |
| H(59)                                              | -6.536 | -2.483 | -1.365 | H(59)                                | -6.161 | 0.246  | -1.714 |
| Cl(2)                                              | 1.550  | -4.083 | -1.165 | Cl(2)                                | 0.149  | -2.393 | -2.465 |
| P(3)                                               | 0.849  | 0.533  | -1.897 | P(3)                                 | 0.036  | 1.112  | -0.589 |
| O(4)                                               | 1.282  | 1.078  | -3.221 | O(4)                                 | -0.160 | 1.376  | -2.054 |
| C(5)                                               | 0.374  | 1.827  | -0.710 | C(5)                                 | 1.130  | 2.472  | 0.073  |
| C(6)                                               | 0.937  | 1.999  | 0.568  | C(6)                                 | 1.311  | 2.688  | 1.445  |
| C(7)                                               | -0.551 | 2.781  | -1.195 | C(7)                                 | 1.803  | 3.300  | -0.838 |
| C(8)                                               | 0.560  | 3.089  | 1.362  | C(8)                                 | 2.160  | 3.699  | 1.901  |
| C(9)                                               | -0.934 | 3.863  | -0.396 | C(9)                                 | 2.639  | 4.320  | -0.383 |
| C(10)                                              | -0.381 | 4.017  | 0.886  | C(10)                                | 2.825  | 4.517  | 0.987  |
| N(16)                                              | 5.367  | -2.988 | -0.389 | O(35)                                | -0.551 | -0.698 | -0.385 |
| N(17)                                              | 2.345  | -0.241 | -1.204 | N(36)                                | -1.221 | 1.402  | 0.516  |
| C(18)                                              | 4.455  | -2.004 | -0.591 | C(37)                                | -2.057 | 0.352  | 1.085  |
| C(19)                                              | 5.040  | -4.088 | 0.538  | C(38)                                | -1.853 | -0.940 | 0.213  |
| C(20)                                              | 6.466  | -3.183 | -1.339 | C(39)                                | -3.473 | 0.981  | 1.214  |
| C(21)                                              | 3.323  | -1.861 | 0.264  | C(40)                                | -3.382 | 2.317  | 0.451  |
| C(22)                                              | 4.538  | -1.082 | -1.685 | C(41)                                | -1.903 | 2.705  | 0.589  |
| C(23)                                              | 2.292  | -1.036 | -0.089 | C(42)                                | -2.924 | -1.116 | -0.884 |
| C(24)                                              | 3.481  | -0.252 | -1.971 | C(43)                                | -1.754 | -2.173 | 1.127  |
| O(35)                                              | -1.443 | -3.172 | -0.855 | C(44)                                | -4.027 | -1.959 | -0.684 |

|       |        |        |        |       |        |        |        |
|-------|--------|--------|--------|-------|--------|--------|--------|
| N(36) | -0.251 | -0.711 | -1.897 | C(45) | -0.893 | -3.236 | 0.826  |
| C(37) | -1.604 | -0.758 | -1.266 | C(46) | -2.838 | -0.401 | -2.090 |
| C(38) | -1.774 | -1.950 | -0.232 | C(47) | -2.553 | -2.270 | 2.278  |
| C(39) | -2.516 | -0.911 | -2.512 | C(48) | -5.023 | -2.083 | -1.654 |
| C(40) | -1.726 | -1.820 | -3.479 | C(49) | -0.826 | -4.353 | 1.661  |
| C(41) | -0.232 | -1.585 | -3.136 | C(50) | -3.835 | -0.526 | -3.058 |
| C(42) | -3.271 | -2.052 | 0.178  | C(51) | -2.491 | -3.391 | 3.106  |
| C(43) | -0.976 | -1.761 | 1.088  | C(52) | -4.933 | -1.365 | -2.850 |
| C(44) | -4.012 | -0.929 | 0.599  | C(53) | -1.622 | -4.438 | 2.803  |
| C(45) | -0.328 | -2.872 | 1.662  | H(11) | 0.771  | 2.075  | 2.162  |
| C(46) | -3.911 | -3.304 | 0.168  | H(12) | 1.643  | 3.149  | -1.901 |
| C(47) | -0.945 | -0.541 | 1.793  | H(13) | 2.292  | 3.854  | 2.968  |
| C(48) | -5.347 | -1.049 | 0.998  | H(14) | 3.141  | 4.965  | -1.098 |
| C(49) | 0.341  | -2.760 | 2.888  | H(15) | 3.478  | 5.310  | 1.340  |
| C(50) | -5.247 | -3.430 | 0.576  | H(54) | -1.686 | 0.106  | 2.087  |
| C(51) | -0.276 | -0.429 | 3.019  | H(55) | -3.689 | 1.161  | 2.272  |
| C(52) | -5.974 | -2.305 | 0.994  | H(56) | -4.262 | 0.336  | 0.823  |
| C(53) | 0.373  | -1.539 | 3.573  | H(57) | -3.620 | 2.165  | -0.605 |
| H(11) | 1.670  | 1.291  | 0.956  | H(58) | -4.060 | 3.077  | 0.847  |
| H(12) | -0.948 | 2.685  | -2.203 | H(60) | -1.559 | 3.372  | -0.204 |
| H(13) | 1.001  | 3.212  | 2.351  | H(61) | -1.707 | 3.196  | 1.554  |
| H(14) | -1.649 | 4.593  | -0.779 | H(63) | -4.109 | -2.540 | 0.227  |
| H(15) | -0.675 | 4.862  | 1.507  | H(64) | -0.281 | -3.202 | -0.068 |
| H(25) | 5.804  | -4.862 | 0.445  | H(65) | -1.982 | 0.233  | -2.295 |
| H(26) | 4.052  | -4.509 | 0.286  | H(66) | -3.241 | -1.471 | 2.536  |
| H(27) | 5.040  | -3.735 | 1.576  | H(67) | -5.860 | -2.752 | -1.479 |
| H(28) | 6.103  | -3.544 | -2.316 | H(68) | -0.150 | -5.165 | 1.406  |
| H(29) | 7.162  | -3.919 | -0.928 | H(69) | -3.741 | 0.025  | -3.989 |
| H(30) | 7.023  | -2.249 | -1.490 | H(70) | -3.123 | -3.441 | 3.989  |
| H(31) | 3.178  | -2.499 | 1.129  | H(71) | -5.693 | -1.480 | -3.618 |
| H(32) | 5.387  | -1.077 | -2.361 | H(72) | -1.568 | -5.310 | 3.448  |
| H(33) | 1.363  | -1.029 | 0.472  | N(16) | 5.384  | -2.035 | -0.956 |
| H(34) | 3.456  | 0.402  | -2.839 | N(17) | 1.760  | 0.010  | -0.631 |
| H(62) | -0.459 | -3.330 | -0.917 | C(18) | 4.197  | -1.371 | -0.852 |
| H(54) | -1.791 | 0.192  | -0.753 | C(19) | 5.936  | -2.735 | 0.197  |
| H(55) | -2.660 | 0.087  | -2.955 | C(20) | 6.020  | -2.190 | -2.260 |
| H(56) | -3.507 | -1.312 | -2.271 | C(21) | 3.495  | -1.282 | 0.380  |
| H(57) | -1.984 | -2.869 | -3.304 | C(22) | 3.593  | -0.735 | -1.964 |
| H(58) | -1.940 | -1.578 | -4.529 | C(23) | 2.302  | -0.597 | 0.441  |
| H(60) | 0.308  | -2.513 | -2.909 | C(24) | 2.390  | -0.078 | -1.817 |
| H(61) | 0.292  | -1.045 | -3.934 | H(25) | 6.902  | -3.160 | -0.073 |
| H(63) | -3.554 | 0.060  | 0.618  | H(26) | 5.285  | -3.552 | 0.535  |
| H(64) | -0.328 | -3.822 | 1.134  | H(27) | 6.095  | -2.050 | 1.038  |

|                                                      |        |        |        |                                      |        |        |        |
|------------------------------------------------------|--------|--------|--------|--------------------------------------|--------|--------|--------|
| H(65)                                                | -3.346 | -4.172 | -0.163 | H(28)                                | 5.386  | -2.749 | -2.959 |
| H(66)                                                | -1.444 | 0.341  | 1.395  | H(29)                                | 6.956  | -2.735 | -2.136 |
| H(67)                                                | -5.897 | -0.163 | 1.314  | H(30)                                | 6.253  | -1.217 | -2.705 |
| H(68)                                                | 0.835  | -3.638 | 3.307  | H(31)                                | 3.865  | -1.755 | 1.279  |
| H(69)                                                | -5.719 | -4.413 | 0.573  | H(32)                                | 4.034  | -0.780 | -2.950 |
| H(70)                                                | -0.269 | 0.529  | 3.540  | H(33)                                | 1.744  | -0.534 | 1.368  |
| H(71)                                                | -7.009 | -2.404 | 1.321  | H(34)                                | 1.874  | 0.390  | -2.647 |
| H(72)                                                | 0.892  | -1.454 | 4.529  | H(62)                                | -0.261 | -1.428 | -1.344 |
| <b>(R<sub>p</sub>)-A·2a</b><br>Energy = -2739.722044 |        |        |        | <b>TS1S</b><br>Energy = -2739.695172 |        |        |        |
| Cl(1)                                                | 1.618  | -0.422 | -0.517 | Cl(1)                                | 1.891  | 1.049  | 1.564  |
| P(3)                                                 | 3.016  | 0.489  | 0.659  | P(3)                                 | 2.375  | 1.418  | -0.393 |
| O(4)                                                 | 2.643  | 0.578  | 2.093  | O(4)                                 | 1.375  | 1.016  | -1.416 |
| C(5)                                                 | 3.553  | 1.964  | -0.209 | C(5)                                 | 2.807  | 3.173  | -0.439 |
| C(6)                                                 | 4.897  | 2.366  | -0.112 | C(6)                                 | 2.274  | 3.916  | -1.504 |
| C(7)                                                 | 2.606  | 2.773  | -0.860 | C(7)                                 | 3.614  | 3.791  | 0.527  |
| C(8)                                                 | 5.294  | 3.571  | -0.689 | C(8)                                 | 2.554  | 5.278  | -1.600 |
| C(9)                                                 | 3.021  | 3.978  | -1.426 | C(9)                                 | 3.891  | 5.152  | 0.415  |
| C(10)                                                | 4.358  | 4.373  | -1.347 | C(10)                                | 3.363  | 5.894  | -0.644 |
| N(16)                                                | 7.161  | -3.730 | 0.243  | H(11)                                | 1.641  | 3.425  | -2.235 |
| N(17)                                                | 4.370  | -0.667 | 0.513  | H(12)                                | 4.033  | 3.220  | 1.349  |
| C(18)                                                | 6.281  | -2.726 | 0.335  | H(13)                                | 2.139  | 5.857  | -2.419 |
| C(19)                                                | 7.505  | -4.529 | 1.426  | H(14)                                | 4.519  | 5.632  | 1.159  |
| C(20)                                                | 7.769  | -4.074 | -1.049 | H(15)                                | 3.580  | 6.955  | -0.721 |
| C(21)                                                | 5.667  | -2.368 | 1.577  | Cl(2)                                | 5.903  | 1.207  | 1.738  |
| C(22)                                                | 5.892  | -1.952 | -0.807 | H(59)                                | 5.034  | 0.761  | 0.742  |
| C(23)                                                | 4.739  | -1.371 | 1.631  | N(16)                                | -5.232 | -0.816 | -0.868 |
| C(24)                                                | 4.956  | -0.968 | -0.691 | N(17)                                | -1.971 | 0.860  | 1.258  |
| H(11)                                                | 5.629  | 1.754  | 0.405  | C(18)                                | -4.158 | -0.288 | -0.178 |
| H(12)                                                | 1.557  | 2.489  | -0.917 | C(19)                                | -5.205 | -0.843 | -2.321 |
| H(13)                                                | 6.332  | 3.880  | -0.624 | C(20)                                | -6.171 | -1.684 | -0.177 |
| H(14)                                                | 2.293  | 4.607  | -1.929 | C(21)                                | -3.110 | 0.400  | -0.829 |
| H(15)                                                | 4.673  | 5.311  | -1.796 | C(22)                                | -4.042 | -0.398 | 1.227  |
| H(25)                                                | 7.982  | -3.911 | 2.192  | C(23)                                | -2.070 | 0.937  | -0.077 |
| H(26)                                                | 8.201  | -5.311 | 1.130  | C(24)                                | -2.956 | 0.189  | 1.868  |
| H(27)                                                | 6.614  | -5.002 | 1.849  | H(25)                                | -5.081 | 0.166  | -2.729 |
| H(28)                                                | 7.006  | -4.377 | -1.772 | H(26)                                | -6.156 | -1.232 | -2.689 |
| H(29)                                                | 8.456  | -4.904 | -0.903 | H(27)                                | -4.396 | -1.474 | -2.722 |
| H(30)                                                | 8.333  | -3.228 | -1.453 | H(28)                                | -5.704 | -2.608 | 0.196  |
| H(31)                                                | 5.915  | -2.879 | 2.497  | H(29)                                | -6.973 | -1.960 | -0.863 |
| H(32)                                                | 6.315  | -2.135 | -1.783 | H(30)                                | -6.629 | -1.168 | 0.674  |
| H(33)                                                | 4.240  | -1.083 | 2.547  | H(31)                                | -3.090 | 0.514  | -1.906 |

|                                                    |        |        |        |                                      |        |        |        |
|----------------------------------------------------|--------|--------|--------|--------------------------------------|--------|--------|--------|
| H(34)                                              | 4.638  | -0.383 | -1.545 | H(32)                                | -4.780 | -0.925 | 1.818  |
| Cl(2)                                              | -1.171 | 2.558  | -0.816 | H(33)                                | -1.254 | 1.442  | -0.591 |
| O(35)                                              | -3.683 | 0.622  | -0.694 | H(34)                                | -2.875 | 0.103  | 2.951  |
| N(36)                                              | -1.685 | 0.014  | 1.551  | O(35)                                | 4.236  | -1.708 | 1.381  |
| C(37)                                              | -3.068 | -0.475 | 1.410  | N(36)                                | 4.120  | 0.448  | -0.516 |
| C(38)                                              | -3.523 | -0.646 | -0.071 | C(37)                                | 4.091  | -1.003 | -0.940 |
| C(39)                                              | -3.979 | 0.486  | 2.238  | C(38)                                | 3.614  | -2.034 | 0.146  |
| C(40)                                              | -2.997 | 1.278  | 3.140  | C(39)                                | 5.572  | -1.213 | -1.337 |
| C(41)                                              | -1.634 | 0.584  | 2.904  | C(40)                                | 6.065  | 0.146  | -1.881 |
| C(42)                                              | -4.919 | -1.306 | -0.068 | C(41)                                | 4.909  | 1.121  | -1.598 |
| C(43)                                              | -2.564 | -1.524 | -0.906 | C(42)                                | 4.146  | -3.434 | -0.242 |
| C(44)                                              | -5.084 | -2.631 | 0.364  | C(43)                                | 2.086  | -2.162 | 0.322  |
| C(45)                                              | -2.594 | -1.401 | -2.303 | C(44)                                | 3.691  | -4.080 | -1.400 |
| C(46)                                              | -6.054 | -0.594 | -0.475 | C(45)                                | 1.593  | -2.557 | 1.575  |
| C(47)                                              | -1.706 | -2.480 | -0.345 | C(46)                                | 5.093  | -4.081 | 0.560  |
| C(48)                                              | -6.346 | -3.224 | 0.396  | C(47)                                | 1.174  | -2.009 | -0.730 |
| C(49)                                              | -1.796 | -2.207 | -3.115 | C(48)                                | 4.181  | -5.335 | -1.756 |
| C(50)                                              | -7.319 | -1.188 | -0.446 | C(49)                                | 0.231  | -2.766 | 1.777  |
| C(51)                                              | -0.908 | -3.292 | -1.157 | C(50)                                | 5.575  | -5.344 | 0.207  |
| C(52)                                              | -7.472 | -2.504 | -0.009 | C(51)                                | -0.190 | -2.230 | -0.531 |
| C(53)                                              | -0.949 | -3.159 | -2.546 | C(52)                                | 5.127  | -5.974 | -0.953 |
| H(62)                                              | -2.824 | 1.101  | -0.737 | C(53)                                | -0.669 | -2.603 | 0.723  |
| H(59)                                              | -1.521 | 0.772  | 0.883  | H(62)                                | 3.841  | -0.892 | 1.719  |
| H(54)                                              | -3.106 | -1.465 | 1.884  | H(54)                                | 3.462  | -1.093 | -1.833 |
| H(55)                                              | -4.717 | -0.072 | 2.820  | H(55)                                | 5.666  | -2.022 | -2.062 |
| H(56)                                              | -4.518 | 1.156  | 1.566  | H(56)                                | 6.134  | -1.497 | -0.445 |
| H(57)                                              | -2.942 | 2.323  | 2.817  | H(57)                                | 6.973  | 0.465  | -1.365 |
| H(58)                                              | -3.292 | 1.276  | 4.195  | H(58)                                | 6.284  | 0.112  | -2.951 |
| H(60)                                              | -0.775 | 1.255  | 3.001  | H(60)                                | 5.245  | 2.098  | -1.249 |
| H(61)                                              | -1.499 | -0.232 | 3.628  | H(61)                                | 4.293  | 1.262  | -2.495 |
| H(63)                                              | -4.218 | -3.213 | 0.664  | H(63)                                | 2.935  | -3.611 | -2.022 |
| H(64)                                              | -3.246 | -0.656 | -2.746 | H(64)                                | 2.292  | -2.698 | 2.393  |
| H(65)                                              | -5.937 | 0.428  | -0.815 | H(65)                                | 5.445  | -3.593 | 1.459  |
| H(66)                                              | -1.632 | -2.578 | 0.732  | H(66)                                | 1.503  | -1.690 | -1.711 |
| H(67)                                              | -6.448 | -4.252 | 0.734  | H(67)                                | 3.815  | -5.817 | -2.658 |
| H(68)                                              | -1.836 | -2.087 | -4.195 | H(68)                                | -0.127 | -3.058 | 2.760  |
| H(69)                                              | -8.186 | -0.616 | -0.767 | H(69)                                | 6.308  | -5.832 | 0.844  |
| H(70)                                              | -0.247 | -4.022 | -0.699 | H(70)                                | -0.878 | -2.090 | -1.358 |
| H(71)                                              | -8.456 | -2.965 | 0.014  | H(71)                                | 5.504  | -6.955 | -1.226 |
| H(72)                                              | -0.327 | -3.788 | -3.176 | H(72)                                | -1.734 | -2.748 | 0.880  |
| <b>(S<sub>p</sub>)-C1</b><br>Energy = -2739.713488 |        |        |        | <b>TS2S</b><br>Energy = -2739.673128 |        |        |        |

|       |        |        |        |       |        |        |        |
|-------|--------|--------|--------|-------|--------|--------|--------|
| Cl(1) | 0.152  | -0.800 | 2.167  | Cl(1) | -0.455 | -0.068 | 2.453  |
| P(3)  | 1.007  | -0.428 | 0.301  | Cl(2) | 7.612  | 0.722  | -0.391 |
| O(4)  | 1.485  | 0.975  | 0.137  | H(59) | 7.235  | -0.517 | -0.291 |
| C(5)  | 2.330  | -1.659 | 0.224  | P(3)  | -0.376 | 0.447  | -0.007 |
| C(6)  | 3.600  | -1.191 | -0.139 | O(4)  | -0.301 | -0.320 | -1.302 |
| C(7)  | 2.137  | -3.016 | 0.532  | C(5)  | -1.139 | 2.111  | -0.035 |
| C(8)  | 4.676  | -2.079 | -0.206 | C(6)  | -1.131 | 2.751  | -1.284 |
| C(9)  | 3.214  | -3.895 | 0.455  | C(7)  | -1.708 | 2.752  | 1.072  |
| C(10) | 4.480  | -3.428 | 0.087  | C(8)  | -1.682 | 4.026  | -1.419 |
| O(35) | -2.850 | -0.824 | 0.483  | C(9)  | -2.257 | 4.028  | 0.929  |
| N(36) | -0.239 | -0.930 | -0.786 | C(10) | -2.244 | 4.666  | -0.313 |
| C(37) | -1.330 | 0.044  | -1.204 | O(35) | 2.675  | -0.999 | 1.924  |
| C(38) | -2.431 | 0.389  | -0.131 | N(36) | 1.257  | 0.832  | 0.270  |
| C(39) | -1.947 | -0.692 | -2.417 | C(37) | 2.399  | 0.047  | -0.258 |
| C(40) | -0.821 | -1.535 | -3.044 | C(38) | 2.682  | -1.296 | 0.536  |
| C(41) | 0.370  | -1.390 | -2.089 | C(39) | 3.597  | 1.037  | -0.117 |
| C(42) | -3.662 | 0.952  | -0.879 | C(40) | 2.999  | 2.361  | 0.388  |
| C(43) | -2.057 | 1.436  | 0.939  | C(41) | 1.751  | 1.905  | 1.146  |
| C(44) | -3.585 | 2.171  | -1.567 | C(42) | 4.096  | -1.813 | 0.204  |
| C(45) | -2.779 | 1.422  | 2.143  | C(43) | 1.715  | -2.470 | 0.237  |
| C(46) | -4.877 | 0.258  | -0.875 | C(44) | 4.494  | -2.036 | -1.123 |
| C(47) | -1.128 | 2.462  | 0.734  | C(45) | 1.377  | -3.346 | 1.280  |
| C(48) | -4.691 | 2.675  | -2.249 | C(46) | 5.010  | -2.087 | 1.229  |
| C(49) | -2.564 | 2.390  | 3.120  | C(47) | 1.253  | -2.771 | -1.052 |
| C(50) | -5.987 | 0.769  | -1.550 | C(48) | 5.769  | -2.513 | -1.418 |
| C(51) | -0.915 | 3.435  | 1.713  | C(49) | 0.601  | -4.481 | 1.045  |
| C(52) | -5.899 | 1.975  | -2.243 | C(50) | 6.288  | -2.570 | 0.937  |
| C(53) | -1.628 | 3.405  | 2.909  | C(51) | 0.480  | -3.907 | -1.289 |
| H(11) | 3.746  | -0.138 | -0.354 | C(52) | 6.677  | -2.783 | -0.388 |
| H(12) | 1.161  | -3.385 | 0.827  | C(53) | 0.152  | -4.771 | -0.244 |
| H(13) | 5.658  | -1.702 | -0.475 | H(11) | -0.704 | 2.242  | -2.142 |
| H(14) | 3.066  | -4.945 | 0.689  | H(12) | -1.714 | 2.252  | 2.034  |
| H(15) | 5.316  | -4.120 | 0.036  | H(13) | -1.672 | 4.517  | -2.388 |
| H(62) | -2.188 | -1.065 | 1.146  | H(14) | -2.693 | 4.523  | 1.791  |
| H(54) | -0.852 | 0.970  | -1.543 | H(15) | -2.671 | 5.660  | -0.419 |
| H(55) | -2.380 | 0.023  | -3.117 | H(62) | 1.765  | -0.747 | 2.170  |
| H(56) | -2.755 | -1.335 | -2.063 | H(54) | 2.190  | -0.186 | -1.303 |
| H(57) | -1.122 | -2.582 | -3.128 | H(55) | 4.135  | 1.151  | -1.060 |
| H(58) | -0.548 | -1.190 | -4.045 | H(56) | 4.309  | 0.656  | 0.616  |
| H(60) | 0.909  | -2.324 | -1.931 | H(57) | 3.696  | 2.920  | 1.021  |
| H(61) | 1.079  | -0.641 | -2.464 | H(58) | 2.705  | 3.005  | -0.447 |
| H(63) | -2.663 | 2.743  | -1.557 | H(60) | 2.006  | 1.532  | 2.144  |
| H(64) | -3.516 | 0.643  | 2.306  | H(61) | 1.003  | 2.690  | 1.257  |



|                                                    |        |        |        |                                      |        |        |        |
|----------------------------------------------------|--------|--------|--------|--------------------------------------|--------|--------|--------|
| H(65)                                              | -4.947 | -0.681 | -0.339 | H(63)                                | 3.805  | -1.842 | -1.938 |
| H(66)                                              | -0.531 | 2.499  | -0.169 | H(64)                                | 1.735  | -3.132 | 2.280  |
| H(67)                                              | -4.611 | 3.621  | -2.776 | H(65)                                | 4.713  | -1.914 | 2.256  |
| H(68)                                              | -3.132 | 2.355  | 4.045  | H(66)                                | 1.456  | -2.101 | -1.878 |
| H(69)                                              | -6.923 | 0.218  | -1.533 | H(67)                                | 6.056  | -2.676 | -2.453 |
| H(70)                                              | -0.179 | 4.214  | 1.537  | H(68)                                | 0.357  | -5.143 | 1.872  |
| H(71)                                              | -6.763 | 2.371  | -2.769 | H(69)                                | 6.979  | -2.776 | 1.750  |
| H(72)                                              | -1.458 | 4.162  | 3.669  | H(70)                                | 0.127  | -4.110 | -2.297 |
| Cl(2)                                              | -1.455 | -3.870 | -0.168 | H(71)                                | 7.666  | -3.170 | -0.616 |
| H(59)                                              | -1.087 | -2.606 | -0.317 | H(72)                                | -0.445 | -5.660 | -0.432 |
| N(16)                                              | 3.977  | 3.716  | -0.872 | N(16)                                | -5.647 | -2.842 | -0.087 |
| N(17)                                              | 6.923  | 0.673  | -0.725 | N(17)                                | -2.202 | -0.470 | 0.257  |
| C(18)                                              | 4.931  | 2.725  | -0.827 | C(18)                                | -4.523 | -2.071 | 0.013  |
| C(19)                                              | 3.196  | 4.011  | 0.327  | C(19)                                | -5.566 | -4.279 | 0.142  |
| C(20)                                              | 3.403  | 4.092  | -2.155 | C(20)                                | -6.869 | -2.276 | -0.641 |
| C(21)                                              | 5.402  | 2.190  | 0.396  | C(21)                                | -3.282 | -2.603 | 0.446  |
| C(22)                                              | 5.513  | 2.179  | -1.996 | C(22)                                | -4.523 | -0.694 | -0.310 |
| C(23)                                              | 6.375  | 1.200  | 0.381  | C(23)                                | -2.179 | -1.786 | 0.553  |
| C(24)                                              | 6.477  | 1.185  | -1.882 | C(24)                                | -3.363 | 0.047  | -0.181 |
| H(25)                                              | 2.594  | 3.151  | 0.648  | H(25)                                | -4.929 | -4.783 | -0.598 |
| H(26)                                              | 2.531  | 4.849  | 0.113  | H(26)                                | -6.566 | -4.708 | 0.080  |
| H(27)                                              | 3.851  | 4.319  | 1.149  | H(27)                                | -5.171 | -4.497 | 1.140  |
| H(28)                                              | 4.184  | 4.401  | -2.855 | H(28)                                | -7.188 | -1.396 | -0.071 |
| H(29)                                              | 2.738  | 4.945  | -2.009 | H(29)                                | -7.666 | -3.017 | -0.581 |
| H(30)                                              | 2.824  | 3.278  | -2.618 | H(30)                                | -6.752 | -1.980 | -1.693 |
| H(31)                                              | 5.010  | 2.526  | 1.347  | H(31)                                | -3.167 | -3.648 | 0.699  |
| H(32)                                              | 5.215  | 2.509  | -2.983 | H(32)                                | -5.413 | -0.194 | -0.669 |
| H(33)                                              | 6.728  | 0.793  | 1.328  | H(33)                                | -1.233 | -2.176 | 0.904  |
| H(34)                                              | 6.912  | 0.766  | -2.788 | H(34)                                | -3.357 | 1.098  | -0.440 |
| <b>(R<sub>p</sub>)-C2</b><br>Energy = -2739.731221 |        |        |        | <b>TS3S</b><br>Energy = -2739.688389 |        |        |        |
| Cl(1)                                              | -1.093 | 0.588  | 2.985  | Cl(1)                                | -0.057 | -2.507 | 0.649  |
| Cl(2)                                              | 3.400  | 1.724  | 2.825  | Cl(2)                                | 4.585  | 3.384  | 1.634  |
| H(59)                                              | 2.541  | 0.920  | 2.218  | H(59)                                | 4.494  | 2.150  | 2.031  |
| P(3)                                               | -1.737 | 1.143  | -1.148 | P(3)                                 | 0.654  | 0.825  | -2.114 |
| O(4)                                               | -1.648 | 0.784  | -2.598 | O(4)                                 | 0.339  | 0.363  | -3.505 |
| C(5)                                               | -2.905 | 2.475  | -0.749 | C(5)                                 | -0.043 | 2.496  | -1.733 |
| C(6)                                               | -3.576 | 3.018  | -1.856 | C(6)                                 | -0.954 | 3.039  | -2.650 |
| C(7)                                               | -3.194 | 2.948  | 0.546  | C(7)                                 | 0.291  | 3.226  | -0.584 |
| C(8)                                               | -4.526 | 4.024  | -1.673 | C(8)                                 | -1.518 | 4.294  | -2.420 |
| C(9)                                               | -4.147 | 3.951  | 0.716  | C(9)                                 | -0.284 | 4.476  | -0.351 |
| C(10)                                              | -4.813 | 4.490  | -0.390 | C(10)                                | -1.188 | 5.012  | -1.269 |

|       |        |        |        |       |        |        |        |
|-------|--------|--------|--------|-------|--------|--------|--------|
| N(16) | -5.149 | -3.408 | 0.785  | O(35) | 1.327  | -0.874 | -1.237 |
| N(17) | -2.636 | -0.308 | -0.431 | N(36) | 2.274  | 1.233  | -1.828 |
| C(18) | -4.308 | -2.415 | 0.400  | C(37) | 3.217  | 0.131  | -2.060 |
| C(19) | -5.349 | -4.579 | -0.065 | C(38) | 2.779  | -1.001 | -1.092 |
| C(20) | -5.862 | -3.312 | 2.059  | C(39) | 4.589  | 0.801  | -1.963 |
| C(21) | -3.660 | -2.425 | -0.871 | C(40) | 4.322  | 2.148  | -2.651 |
| C(22) | -4.020 | -1.308 | 1.241  | C(41) | 2.907  | 2.533  | -2.175 |
| C(23) | -2.869 | -1.372 | -1.253 | C(42) | 3.225  | -0.711 | 0.349  |
| C(24) | -3.184 | -0.308 | 0.816  | C(43) | 3.232  | -2.399 | -1.548 |
| O(35) | 1.402  | -0.113 | 1.357  | C(44) | 4.539  | -1.021 | 0.732  |
| N(36) | -0.310 | 1.380  | -0.358 | C(45) | 2.866  | -3.519 | -0.783 |
| C(37) | 0.952  | 0.753  | -0.878 | C(46) | 2.391  | -0.091 | 1.284  |
| C(38) | 1.411  | -0.476 | -0.017 | C(47) | 4.029  | -2.604 | -2.683 |
| C(39) | 1.994  | 1.913  | -0.839 | C(48) | 5.011  | -0.702 | 2.003  |
| C(40) | 1.218  | 3.179  | -0.453 | C(49) | 3.271  | -4.799 | -1.156 |
| C(41) | 0.050  | 2.638  | 0.368  | C(50) | 2.857  | 0.223  | 2.564  |
| C(42) | 2.866  | -0.870 | -0.366 | C(51) | 4.445  | -3.886 | -3.047 |
| C(43) | 0.572  | -1.756 | -0.256 | C(52) | 4.174  | -0.073 | 2.930  |
| C(44) | 3.370  | -0.795 | -1.673 | C(53) | 4.065  | -4.990 | -2.287 |
| C(45) | 0.083  | -2.501 | 0.825  | H(11) | -1.203 | 2.475  | -3.544 |
| C(46) | 3.697  | -1.387 | 0.636  | H(12) | 1.013  | 2.825  | 0.122  |
| C(47) | 0.428  | -2.287 | -1.550 | H(13) | -2.212 | 4.713  | -3.143 |
| C(48) | 4.668  | -1.210 | -1.967 | H(14) | -0.018 | 5.034  | 0.543  |
| C(49) | -0.503 | -3.754 | 0.618  | H(15) | -1.630 | 5.988  | -1.091 |
| C(50) | 4.996  | -1.802 | 0.342  | H(62) | 0.766  | -1.500 | -0.547 |
| C(51) | -0.151 | -3.539 | -1.755 | H(54) | 3.075  | -0.252 | -3.079 |
| C(52) | 5.489  | -1.715 | -0.960 | H(55) | 5.379  | 0.220  | -2.447 |
| C(53) | -0.609 | -4.285 | -0.668 | H(56) | 4.871  | 0.960  | -0.921 |
| H(11) | -3.348 | 2.645  | -2.850 | H(57) | 5.062  | 2.912  | -2.397 |
| H(12) | -2.673 | 2.554  | 1.417  | H(58) | 4.327  | 2.024  | -3.740 |
| H(13) | -5.036 | 4.445  | -2.535 | H(60) | 2.946  | 3.165  | -1.282 |
| H(14) | -4.364 | 4.315  | 1.716  | H(61) | 2.353  | 3.070  | -2.949 |
| H(15) | -5.551 | 5.275  | -0.248 | H(63) | 5.198  | -1.519 | 0.028  |
| H(25) | -5.706 | -4.302 | -1.063 | H(64) | 2.234  | -3.390 | 0.090  |
| H(26) | -6.096 | -5.227 | 0.394  | H(65) | 1.359  | 0.106  | 1.033  |
| H(27) | -4.419 | -5.149 | -0.175 | H(66) | 4.343  | -1.772 | -3.302 |
| H(28) | -5.174 | -3.268 | 2.911  | H(67) | 6.031  | -0.955 | 2.277  |
| H(29) | -6.496 | -4.191 | 2.179  | H(68) | 2.961  | -5.649 | -0.555 |
| H(30) | -6.503 | -2.422 | 2.082  | H(69) | 2.183  | 0.686  | 3.279  |
| H(31) | -3.773 | -3.251 | -1.564 | H(70) | 5.065  | -4.015 | -3.930 |
| H(32) | -4.410 | -1.238 | 2.250  | H(71) | 4.531  | 0.155  | 3.930  |
| H(33) | -2.396 | -1.317 | -2.227 | H(72) | 4.384  | -5.988 | -2.574 |
| H(34) | -2.870 | 0.471  | 1.500  | N(16) | -4.513 | -1.627 | 0.274  |

|       |        |        |        |       |        |        |        |
|-------|--------|--------|--------|-------|--------|--------|--------|
| H(62) | 0.489  | 0.075  | 1.726  | N(17) | -1.001 | 0.072  | -1.217 |
| H(54) | 0.763  | 0.434  | -1.905 | C(18) | -3.378 | -1.059 | -0.222 |
| H(55) | 2.508  | 2.013  | -1.797 | C(19) | -5.151 | -2.723 | -0.448 |
| H(56) | 2.754  | 1.701  | -0.084 | C(20) | -4.927 | -1.348 | 1.645  |
| H(57) | 1.829  | 3.882  | 0.118  | C(21) | -2.865 | -1.396 | -1.499 |
| H(58) | 0.838  | 3.695  | -1.342 | C(22) | -2.646 | -0.089 | 0.509  |
| H(60) | 0.327  | 2.383  | 1.393  | C(23) | -1.695 | -0.828 | -1.945 |
| H(61) | -0.791 | 3.323  | 0.407  | C(24) | -1.482 | 0.426  | -0.008 |
| H(63) | 2.759  | -0.400 | -2.479 | H(25) | -5.481 | -2.402 | -1.442 |
| H(64) | 0.172  | -2.105 | 1.830  | H(26) | -6.031 | -3.048 | 0.106  |
| H(65) | 3.322  | -1.456 | 1.651  | H(27) | -4.477 | -3.581 | -0.564 |
| H(66) | 0.805  | -1.742 | -2.410 | H(28) | -4.187 | -1.699 | 2.375  |
| H(67) | 5.037  | -1.130 | -2.985 | H(29) | -5.873 | -1.854 | 1.839  |
| H(68) | -0.857 | -4.321 | 1.475  | H(30) | -5.087 | -0.275 | 1.796  |
| H(69) | 5.625  | -2.191 | 1.139  | H(31) | -3.357 | -2.119 | -2.135 |
| H(70) | -0.224 | -3.937 | -2.764 | H(32) | -2.952 | 0.229  | 1.496  |
| H(71) | 6.503  | -2.035 | -1.186 | H(33) | -1.262 | -1.061 | -2.911 |
| H(72) | -1.034 | -5.275 | -0.821 | H(34) | -0.913 | 1.162  | 0.546  |
